# Supplementary material for: Familial Loss of a Loved One and Biological Aging: NIMHD Social Epigenomics Program
Source: PubMed Central journal article supplement (PMC11287397; doi:10.1001/jamanetworkopen.2024.21869), 2024-07-29
Supplement: jamanetwopen-e2421869-s001.pdf [file jamanetwopen-e2421869-s001.pdf]

## Supplemental Online Content

Aiello AE, Mishra AA, Martin CL, et al. Familial loss of a loved one and biological aging: NIMHD social epigenomics program. *JAMA Netw Open*. 2024;7(7):e2421869.  
doi:10.1001/jamanetworkopen.2024.21869

**eTable 1.** Number of Losses and Biological Aging

**eTable 2.** Parental Loss at Any Time Period (Childhood to Adulthood) and Biological Aging

**eTable 3.** Any Loss in Childhood and in Adulthood and Biological Aging

**eTable 4.** Parental Loss in Childhood and in Adulthood and Biological Aging

**eTable 5.** Count of Losses and Biological Aging

**eTable 6.** Parental Loss at Any Time Period (Childhood to Adulthood) and Biological Aging

**eTable 7.** Any Loss in Childhood and in Adulthood and Biological Aging

**eTable 8.** Parental Loss in Childhood and in Adulthood and Biological Aging

**eTable 9.** Number of Losses and Biological Aging

**eTable 10.** Parental Loss at Any Time Period (Childhood to Adulthood) and Biological Aging

**eTable 11.** Any Loss in Childhood and in Adulthood and Biological Aging

**eTable 12.** Parental Loss in Childhood and in Adulthood and Biological Aging

**eTable 13.** Number of Losses and Biological Aging

**eTable 14.** Parental Loss at Any Time Period (Childhood to Adulthood) and Biological Aging

**eTable 15.** Any Loss in Childhood and in Adulthood and Biological Aging

**eTable 16.** Parental Loss in Childhood and in Adulthood and Biological Aging

**eTable 17.** Parental Loss by Gender of Parent at Any Time Period (Childhood to Adulthood) and Biological Aging

**eTable 18.** Interaction Between Any Loss in Childhood and in Adulthood and its Association With Biological

**eTable 19.** Interaction Between Parental Loss in Childhood and in Adulthood and its Association With Biological Aging

This supplemental material has been provided by the authors to give readers additional information about their work.

eTable 1. Number of Losses and Biological Aging ( $n = 3,963$ )

| Horvath                                     |       |      |       |     |                         |                         |
|---------------------------------------------|-------|------|-------|-----|-------------------------|-------------------------|
|                                             | b     | se   | p     |     | 95% CI<br>(Lower Limit) | 95% CI<br>(Upper Limit) |
| One Loss: Yes <sup>a</sup>                  | -0.01 | 0.05 | 0.784 |     | -0.10                   | 0.08                    |
| Two or More Losses: Yes <sup>a</sup>        | -0.09 | 0.07 | 0.236 |     | -0.23                   | 0.06                    |
| Age                                         | -0.02 | 0.01 | 0.185 |     | -0.04                   | 0.01                    |
| Race: Black <sup>b</sup>                    | 0.01  | 0.08 | 0.920 |     | -0.15                   | 0.17                    |
| Race: Hispanic <sup>b</sup>                 | -0.19 | 0.10 | 0.069 |     | -0.39                   | 0.01                    |
| Race: Other <sup>b,c</sup>                  | 0.02  | 0.09 | 0.802 |     | -0.15                   | 0.19                    |
| Parent Education: High School <sup>d</sup>  | 0.15  | 0.06 | 0.012 | *   | 0.03                    | 0.27                    |
| Parent Education: Some College <sup>d</sup> | 0.07  | 0.05 | 0.179 |     | -0.03                   | 0.16                    |
| Gender: Female <sup>e</sup>                 | -0.34 | 0.05 | 0.000 | *** | -0.43                   | -0.25                   |
| Proportion of Households under Poverty      | 0.09  | 0.19 | 0.644 |     | -0.29                   | 0.46                    |
| No. of Household Members                    | 0.01  | 0.02 | 0.718 |     | -0.03                   | 0.05                    |
| Caregiver Smokes: Yes <sup>f</sup>          | -0.08 | 0.05 | 0.172 |     | -0.18                   | 0.03                    |
| Epigenetic Assay: Batch 1 <sup>g</sup>      | 0.28  | 0.20 | 0.175 |     | -0.13                   | 0.68                    |
| Epigenetic Assay: Batch 2 <sup>g</sup>      | 0.41  | 0.20 | 0.045 | *   | 0.01                    | 0.80                    |
| CD4T                                        | -0.91 | 1.40 | 0.520 |     | -3.69                   | 1.88                    |
| CD8T                                        | 3.69  | 1.45 | 0.012 | *   | 0.81                    | 6.56                    |
| Bcell                                       | 0.37  | 1.36 | 0.788 |     | -2.33                   | 3.06                    |
| NK                                          | 3.13  | 1.64 | 0.058 |     | -0.11                   | 6.38                    |
| Mono                                        | -0.97 | 1.74 | 0.580 |     | -4.41                   | 2.48                    |
| Gran                                        | 1.44  | 1.33 | 0.283 |     | -1.20                   | 4.08                    |
| PhenoAge                                    |       |      |       |     |                         |                         |
|                                             | b     | se   | p     |     | 95% CI<br>(Lower Limit) | 95% CI<br>(Upper Limit) |
| One Loss: Yes <sup>a</sup>                  | 0.07  | 0.05 | 0.122 |     | -0.02                   | 0.16                    |
| Two or More Losses: Yes <sup>a</sup>        | 0.18  | 0.06 | 0.005 | **  | 0.05                    | 0.30                    |
| Age                                         | -0.02 | 0.01 | 0.133 |     | -0.04                   | 0.01                    |
| Race: Black <sup>b</sup>                    | 0.03  | 0.08 | 0.716 |     | -0.12                   | 0.18                    |
| Race: Hispanic <sup>b</sup>                 | 0.04  | 0.09 | 0.631 |     | -0.13                   | 0.22                    |
| Race: Other <sup>b,c</sup>                  | 0.06  | 0.10 | 0.582 |     | -0.15                   | 0.26                    |
| Parent Education: High School <sup>d</sup>  | 0.24  | 0.05 | 0.000 | *** | 0.14                    | 0.34                    |
| Parent Education: Some College <sup>d</sup> | 0.15  | 0.05 | 0.006 | **  | 0.05                    | 0.26                    |
| Gender: Female <sup>e</sup>                 | 0.10  | 0.04 | 0.016 | *   | 0.02                    | 0.18                    |
| Proportion of Households under Poverty      | 0.25  | 0.23 | 0.282 |     | -0.20                   | 0.70                    |
| No. of Household Members                    | -0.02 | 0.02 | 0.229 |     | -0.06                   | 0.01                    |
| Caregiver Smokes: Yes <sup>f</sup>          | 0.07  | 0.05 | 0.141 |     | -0.02                   | 0.17                    |

|                                        |       |      |       |     |       |       |
|----------------------------------------|-------|------|-------|-----|-------|-------|
| Epigenetic Assay: Batch 1 <sup>g</sup> | -0.26 | 0.13 | 0.053 |     | -0.53 | 0.00  |
| Epigenetic Assay: Batch 2 <sup>g</sup> | -0.23 | 0.14 | 0.088 |     | -0.50 | 0.04  |
| CD4T                                   | 1.01  | 1.39 | 0.466 |     | -1.73 | 3.76  |
| CD8T                                   | 1.11  | 1.34 | 0.410 |     | -1.55 | 3.77  |
| Bcell                                  | 1.06  | 1.62 | 0.516 |     | -2.16 | 4.28  |
| NK                                     | 6.01  | 1.58 | 0.000 | *** | 2.88  | 9.15  |
| Mono                                   | 6.90  | 1.77 | 0.000 | *** | 3.39  | 10.40 |
| Gran                                   | 5.86  | 1.34 | 0.000 | *** | 3.20  | 8.52  |

GrimAge

|                                             | b     | se   | p     |     | 95% CI<br>(Lower Limit) | 95% CI<br>(Upper Limit) |
|---------------------------------------------|-------|------|-------|-----|-------------------------|-------------------------|
| One Loss: Yes <sup>a</sup>                  | 0.17  | 0.05 | 0.001 | *** | 0.07                    | 0.27                    |
| Two or More Losses: Yes <sup>a</sup>        | 0.27  | 0.08 | 0.001 | **  | 0.11                    | 0.44                    |
| Age                                         | -0.05 | 0.01 | 0.000 | *** | -0.07                   | -0.03                   |
| Race: Black <sup>b</sup>                    | 0.29  | 0.07 | 0.000 | *** | 0.15                    | 0.43                    |
| Race: Hispanic <sup>b</sup>                 | -0.34 | 0.08 | 0.000 | *** | -0.49                   | -0.18                   |
| Race: Other <sup>b,c</sup>                  | 0.02  | 0.10 | 0.806 |     | -0.16                   | 0.21                    |
| Parent Education: High School <sup>d</sup>  | 0.37  | 0.06 | 0.000 | *** | 0.26                    | 0.48                    |
| Parent Education: Some College <sup>d</sup> | 0.26  | 0.05 | 0.000 | *** | 0.15                    | 0.36                    |
| Gender: Female <sup>e</sup>                 | -0.49 | 0.04 | 0.000 | *** | -0.57                   | -0.41                   |
| Proportion of Households under Poverty      | 0.59  | 0.24 | 0.017 | *   | 0.11                    | 1.08                    |
| No. of Household Members                    | 0.02  | 0.02 | 0.225 |     | -0.02                   | 0.06                    |
| Caregiver Smokes: Yes <sup>f</sup>          | 0.42  | 0.05 | 0.000 | *** | 0.31                    | 0.53                    |
| Epigenetic Assay: Batch 1 <sup>g</sup>      | -0.17 | 0.27 | 0.524 |     | -0.71                   | 0.37                    |
| Epigenetic Assay: Batch 2 <sup>g</sup>      | 0.22  | 0.27 | 0.418 |     | -0.31                   | 0.75                    |
| CD4T                                        | 1.75  | 1.18 | 0.140 |     | -0.58                   | 4.08                    |
| CD8T                                        | 0.95  | 1.17 | 0.419 |     | -1.37                   | 3.26                    |
| Bcell                                       | 0.56  | 1.39 | 0.691 |     | -2.21                   | 3.32                    |
| NK                                          | -0.86 | 1.35 | 0.526 |     | -3.52                   | 1.81                    |
| Mono                                        | 1.85  | 1.41 | 0.192 |     | -0.94                   | 4.65                    |
| Gran                                        | 3.66  | 1.12 | 0.001 | **  | 1.44                    | 5.89                    |

DunedinPACE

|                                      | b    | se   | p     |     | 95% CI<br>(Lower Limit) | 95% CI<br>(Upper Limit) |
|--------------------------------------|------|------|-------|-----|-------------------------|-------------------------|
| One Loss: Yes <sup>a</sup>           | 0.16 | 0.05 | 0.001 | *** | 0.07                    | 0.25                    |
| Two or More Losses: Yes <sup>a</sup> | 0.22 | 0.06 | 0.000 | *** | 0.11                    | 0.34                    |
| Age                                  | 0.01 | 0.01 | 0.237 |     | -0.01                   | 0.04                    |
| Race: Black <sup>b</sup>             | 0.47 | 0.07 | 0.000 | *** | 0.33                    | 0.61                    |
| Race: Hispanic <sup>b</sup>          | 0.10 | 0.10 | 0.284 |     | -0.09                   | 0.30                    |
| Race: Other <sup>b,c</sup>           | 0.29 | 0.10 | 0.006 | **  | 0.09                    | 0.50                    |

|                                             |       |      |       |     |       |      |
|---------------------------------------------|-------|------|-------|-----|-------|------|
| Parent Education: High School <sup>d</sup>  | 0.45  | 0.05 | 0.000 | *** | 0.34  | 0.55 |
| Parent Education: Some College <sup>d</sup> | 0.26  | 0.05 | 0.000 | *** | 0.15  | 0.36 |
| Gender: Female <sup>e</sup>                 | 0.11  | 0.04 | 0.007 | **  | 0.03  | 0.19 |
| Proportion of Households under Poverty      | 0.72  | 0.23 | 0.002 | **  | 0.27  | 1.17 |
| No. of Household Members                    | 0.01  | 0.02 | 0.418 |     | -0.02 | 0.05 |
| Caregiver Smokes: Yes <sup>f</sup>          | 0.18  | 0.05 | 0.001 | *** | 0.07  | 0.28 |
| Epigenetic Assay: Batch 1 <sup>g</sup>      | 0.02  | 0.12 | 0.887 |     | -0.22 | 0.26 |
| Epigenetic Assay: Batch 2 <sup>g</sup>      | 0.08  | 0.12 | 0.487 |     | -0.15 | 0.32 |
| CD4T                                        | -1.33 | 1.38 | 0.340 |     | -4.06 | 1.41 |
| CD8T                                        | -1.91 | 1.30 | 0.146 |     | -4.48 | 0.67 |
| Bcell                                       | 3.70  | 1.53 | 0.017 | *   | 0.67  | 6.73 |
| NK                                          | -2.02 | 1.49 | 0.177 |     | -4.97 | 0.92 |
| Mono                                        | 0.98  | 1.49 | 0.512 |     | -1.97 | 3.93 |
| Gran                                        | 2.35  | 1.33 | 0.079 |     | -0.28 | 4.99 |

*Note:* a = No Loss (reference) b = White (reference); c = Asian, Native American, Pacific Islander, Other (other race or multi-racial); d = College or Higher reference; e = Male (reference); f = No (reference); g = Batch 3 (reference)

\* $p \leq 0.05$ ; \*\* $p \leq 0.01$ ; \*\*\* $p \leq 0.001$

NK - Natural Killer; Mono - Monocytes; Gran - Granulocytes

eTable 2. Parental Loss at Any Time Period (Childhood to Adulthood) and Biological Aging ( $n = 3,963$ )

| Horvath                                     |       |      |       |     |                         |                         |
|---------------------------------------------|-------|------|-------|-----|-------------------------|-------------------------|
|                                             | b     | se   | p     |     | 95% CI<br>(Lower Limit) | 95% CI<br>(Upper Limit) |
| Parental Loss: Yes <sup>a</sup>             | 0.00  | 0.05 | 0.983 |     | -0.10                   | 0.09                    |
| Age                                         | -0.02 | 0.01 | 0.147 |     | -0.04                   | 0.01                    |
| Race: Black <sup>b</sup>                    | 0.00  | 0.08 | 0.997 |     | -0.16                   | 0.16                    |
| Race: Hispanic <sup>b</sup>                 | -0.18 | 0.10 | 0.076 |     | -0.39                   | 0.02                    |
| Race: Other <sup>b,c</sup>                  | 0.02  | 0.08 | 0.801 |     | -0.15                   | 0.19                    |
| Parent Education: High School <sup>d</sup>  | 0.15  | 0.06 | 0.016 | *   | 0.03                    | 0.27                    |
| Parent Education: Some College <sup>d</sup> | 0.06  | 0.05 | 0.202 |     | -0.03                   | 0.16                    |
| Gender: Female <sup>e</sup>                 | -0.34 | 0.05 | 0.000 | *** | -0.43                   | -0.25                   |
| Proportion of Households under Poverty      | 0.07  | 0.19 | 0.711 |     | -0.30                   | 0.44                    |
| No. of Household Members                    | 0.01  | 0.02 | 0.700 |     | -0.03                   | 0.05                    |
| Caregiver Smokes: Yes <sup>f</sup>          | -0.08 | 0.06 | 0.149 |     | -0.19                   | 0.03                    |
| Epigenetic Assay: Batch 1 <sup>g</sup>      | 0.27  | 0.21 | 0.189 |     | -0.14                   | 0.68                    |
| Epigenetic Assay: Batch 2 <sup>g</sup>      | 0.40  | 0.20 | 0.049 | *   | 0.00                    | 0.80                    |
| CD4T                                        | -0.92 | 1.41 | 0.514 |     | -3.71                   | 1.87                    |
| CD8T                                        | 3.67  | 1.45 | 0.013 | *   | 0.79                    | 6.55                    |
| Bcell                                       | 0.33  | 1.37 | 0.808 |     | -2.38                   | 3.04                    |
| NK                                          | 3.12  | 1.64 | 0.060 |     | -0.13                   | 6.37                    |
| Mono                                        | -0.96 | 1.74 | 0.583 |     | -4.41                   | 2.49                    |
| Gran                                        | 1.42  | 1.34 | 0.290 |     | -1.23                   | 4.07                    |
| PhenoAge                                    |       |      |       |     |                         |                         |
|                                             | b     | se   | p     |     | 95% CI<br>(Lower Limit) | 95% CI<br>(Upper Limit) |
| Parental Loss: Yes <sup>a</sup>             | 0.11  | 0.04 | 0.015 | *   | 0.02                    | 0.20                    |
| Age                                         | -0.02 | 0.01 | 0.145 |     | -0.04                   | 0.01                    |
| Race: Black <sup>b</sup>                    | 0.03  | 0.08 | 0.685 |     | -0.12                   | 0.18                    |
| Race: Hispanic <sup>b</sup>                 | 0.04  | 0.09 | 0.685 |     | -0.14                   | 0.22                    |
| Race: Other <sup>b,c</sup>                  | 0.05  | 0.10 | 0.616 |     | -0.15                   | 0.26                    |
| Parent Education: High School <sup>d</sup>  | 0.24  | 0.05 | 0.000 | *** | 0.14                    | 0.35                    |
| Parent Education: Some College <sup>d</sup> | 0.16  | 0.05 | 0.005 | **  | 0.05                    | 0.26                    |
| Gender: Female <sup>e</sup>                 | 0.10  | 0.04 | 0.016 | *   | 0.02                    | 0.18                    |
| Proportion of Households under Poverty      | 0.26  | 0.23 | 0.258 |     | -0.19                   | 0.71                    |
| No. of Household Members                    | -0.02 | 0.02 | 0.269 |     | -0.06                   | 0.02                    |
| Caregiver Smokes: Yes <sup>f</sup>          | 0.07  | 0.05 | 0.135 |     | -0.02                   | 0.17                    |
| Epigenetic Assay: Batch 1 <sup>g</sup>      | -0.27 | 0.13 | 0.050 |     | -0.53                   | 0.00                    |
| Epigenetic Assay: Batch 2 <sup>g</sup>      | -0.24 | 0.14 | 0.082 |     | -0.51                   | 0.03                    |
| CD4T                                        | 1.05  | 1.39 | 0.450 |     | -1.70                   | 3.81                    |
| CD8T                                        | 1.16  | 1.35 | 0.389 |     | -1.50                   | 3.83                    |

|       |      |      |       |     |       |       |
|-------|------|------|-------|-----|-------|-------|
| Bcell | 1.16 | 1.63 | 0.478 |     | -2.07 | 4.39  |
| NK    | 6.07 | 1.58 | 0.000 | *** | 2.93  | 9.21  |
| Mono  | 6.90 | 1.78 | 0.000 | *** | 3.38  | 10.42 |
| Gran  | 5.91 | 1.35 | 0.000 | *** | 3.24  | 8.58  |

GrimAge

|                                             | b     | se   | p     |     | 95% CI<br>(Lower Limit) | 95% CI<br>(Upper Limit) |
|---------------------------------------------|-------|------|-------|-----|-------------------------|-------------------------|
| Parental Loss: Yes <sup>a</sup>             | 0.20  | 0.05 | 0.000 | *** | 0.10                    | 0.29                    |
| Age                                         | -0.05 | 0.01 | 0.000 | *** | -0.07                   | -0.03                   |
| Race: Black <sup>b</sup>                    | 0.30  | 0.07 | 0.000 | *** | 0.16                    | 0.43                    |
| Race: Hispanic <sup>b</sup>                 | -0.34 | 0.08 | 0.000 | *** | -0.50                   | -0.18                   |
| Race: Other <sup>b,c</sup>                  | 0.02  | 0.10 | 0.835 |     | -0.17                   | 0.21                    |
| Parent Education: High School <sup>d</sup>  | 0.38  | 0.06 | 0.000 | *** | 0.27                    | 0.50                    |
| Parent Education: Some College <sup>d</sup> | 0.26  | 0.05 | 0.000 | *** | 0.16                    | 0.37                    |
| Gender: Female <sup>e</sup>                 | -0.49 | 0.04 | 0.000 | *** | -0.57                   | -0.41                   |
| Proportion of Households under Poverty      | 0.61  | 0.25 | 0.015 | *   | 0.12                    | 1.10                    |
| No. of Household Members                    | 0.03  | 0.02 | 0.182 |     | -0.01                   | 0.07                    |
| Caregiver Smokes: Yes <sup>f</sup>          | 0.42  | 0.05 | 0.000 | *** | 0.31                    | 0.53                    |
| Epigenetic Assay: Batch 1 <sup>g</sup>      | -0.18 | 0.27 | 0.500 |     | -0.72                   | 0.35                    |
| Epigenetic Assay: Batch 2 <sup>g</sup>      | 0.21  | 0.26 | 0.435 |     | -0.32                   | 0.73                    |
| CD4T                                        | 1.79  | 1.17 | 0.130 |     | -0.53                   | 4.11                    |
| CD8T                                        | 1.02  | 1.16 | 0.381 |     | -1.28                   | 3.32                    |
| Bcell                                       | 0.69  | 1.41 | 0.624 |     | -2.09                   | 3.48                    |
| NK                                          | -0.80 | 1.33 | 0.550 |     | -3.44                   | 1.84                    |
| Mono                                        | 1.84  | 1.42 | 0.197 |     | -0.97                   | 4.64                    |
| Gran                                        | 3.73  | 1.12 | 0.001 | **  | 1.52                    | 5.94                    |

DunedinPACE

|                                             | b    | se   | p     |     | 95% CI<br>(Lower Limit) | 95% CI<br>(Upper Limit) |
|---------------------------------------------|------|------|-------|-----|-------------------------|-------------------------|
| Parental Loss: Yes <sup>a</sup>             | 0.19 | 0.04 | 0.000 | *** | 0.10                    | 0.27                    |
| Age                                         | 0.01 | 0.01 | 0.223 |     | -0.01                   | 0.04                    |
| Race: Black <sup>b</sup>                    | 0.47 | 0.07 | 0.000 | *** | 0.33                    | 0.62                    |
| Race: Hispanic <sup>b</sup>                 | 0.10 | 0.10 | 0.307 |     | -0.10                   | 0.30                    |
| Race: Other <sup>b,c</sup>                  | 0.29 | 0.10 | 0.006 | **  | 0.08                    | 0.49                    |
| Parent Education: High School <sup>d</sup>  | 0.46 | 0.05 | 0.000 | *** | 0.35                    | 0.56                    |
| Parent Education: Some College <sup>d</sup> | 0.26 | 0.05 | 0.000 | *** | 0.16                    | 0.36                    |
| Gender: Female <sup>e</sup>                 | 0.11 | 0.04 | 0.007 | **  | 0.03                    | 0.19                    |
| Proportion of Households under Poverty      | 0.73 | 0.23 | 0.002 | **  | 0.28                    | 1.18                    |
| No. of Household Members                    | 0.02 | 0.02 | 0.346 |     | -0.02                   | 0.05                    |
| Caregiver Smokes: Yes <sup>f</sup>          | 0.18 | 0.05 | 0.001 | *** | 0.07                    | 0.28                    |
| Epigenetic Assay: Batch 1 <sup>g</sup>      | 0.01 | 0.12 | 0.958 |     | -0.23                   | 0.25                    |

|                                        |       |      |       |   |       |      |
|----------------------------------------|-------|------|-------|---|-------|------|
| Epigenetic Assay: Batch 2 <sup>g</sup> | 0.07  | 0.12 | 0.545 |   | -0.16 | 0.31 |
| CD4T                                   | -1.29 | 1.38 | 0.350 |   | -4.03 | 1.44 |
| CD8T                                   | -1.84 | 1.30 | 0.159 |   | -4.42 | 0.73 |
| Bcell                                  | 3.81  | 1.54 | 0.015 | * | 0.77  | 6.86 |
| NK                                     | -1.98 | 1.48 | 0.185 |   | -4.92 | 0.96 |
| Mono                                   | 0.97  | 1.49 | 0.519 |   | -1.99 | 3.93 |
| Gran                                   | 2.40  | 1.33 | 0.073 |   | -0.22 | 5.03 |

*Note:* a = No Loss (reference) b = White (reference); c = Asian, Native American, Pacific Islander, Other (other race or multi-racial); d = College or Higher reference; e = Male (reference); f = No (reference); g = Batch 3 (reference)

\* $p \leq 0.05$ ; \*\* $p \leq 0.01$ ; \*\*\* $p \leq 0.001$

NK - Natural Killer; Mono - Monocytes; Gran - Granulocytes



eTable 3. Any Loss in Childhood and in Adulthood and Biological Aging (*n* = 3,963)

| Horvath                                     |       |      |       |     |                         |                         |
|---------------------------------------------|-------|------|-------|-----|-------------------------|-------------------------|
|                                             | b     | se   | p     |     | 95% CI<br>(Lower Limit) | 95% CI<br>(Upper Limit) |
| Any Loss in Childhood: Yes <sup>a</sup>     | -0.04 | 0.07 | 0.561 |     | -0.19                   | 0.10                    |
| Any Loss in Adulthood: Yes <sup>a</sup>     | -0.01 | 0.05 | 0.824 |     | -0.11                   | 0.09                    |
| Age                                         | -0.02 | 0.01 | 0.152 |     | -0.04                   | 0.01                    |
| Race: Black <sup>b</sup>                    | 0.00  | 0.08 | 0.964 |     | -0.16                   | 0.16                    |
| Race: Hispanic <sup>b</sup>                 | -0.18 | 0.10 | 0.075 |     | -0.39                   | 0.02                    |
| Race: Other <sup>b,c</sup>                  | 0.02  | 0.09 | 0.792 |     | -0.15                   | 0.19                    |
| Parent Education: High School <sup>d</sup>  | 0.15  | 0.06 | 0.015 | *   | 0.03                    | 0.27                    |
| Parent Education: Some College <sup>d</sup> | 0.06  | 0.05 | 0.203 |     | -0.03                   | 0.16                    |
| Gender: Female <sup>e</sup>                 | -0.34 | 0.05 | 0.000 | *** | -0.43                   | -0.25                   |
| Proportion of Households under Poverty      | 0.08  | 0.19 | 0.683 |     | -0.29                   | 0.45                    |
| No. of Household Members                    | 0.01  | 0.02 | 0.720 |     | -0.03                   | 0.05                    |
| Caregiver Smokes: Yes <sup>f</sup>          | -0.08 | 0.06 | 0.161 |     | -0.19                   | 0.03                    |
| Epigenetic Assay: Batch 1 <sup>g</sup>      | 0.27  | 0.21 | 0.186 |     | -0.13                   | 0.68                    |
| Epigenetic Assay: Batch 2 <sup>g</sup>      | 0.40  | 0.20 | 0.048 | *   | 0.00                    | 0.80                    |
| CD4T                                        | -0.91 | 1.40 | 0.516 |     | -3.69                   | 1.87                    |
| CD8T                                        | 3.67  | 1.45 | 0.013 | *   | 0.79                    | 6.54                    |
| Bcell                                       | 0.35  | 1.37 | 0.799 |     | -2.36                   | 3.06                    |
| NK                                          | 3.12  | 1.64 | 0.059 |     | -0.12                   | 6.36                    |
| Mono                                        | -0.96 | 1.74 | 0.582 |     | -4.41                   | 2.49                    |
| Gran                                        | 1.42  | 1.33 | 0.288 |     | -1.22                   | 4.06                    |
| PhenoAge                                    |       |      |       |     |                         |                         |
|                                             | b     | se   | p     |     | 95% CI<br>(Lower Limit) | 95% CI<br>(Upper Limit) |
| Any Loss in Childhood: Yes <sup>a</sup>     | 0.12  | 0.07 | 0.084 |     | -0.02                   | 0.26                    |
| Any Loss in Adulthood: Yes <sup>a</sup>     | 0.08  | 0.05 | 0.082 |     | -0.01                   | 0.18                    |
| Age                                         | -0.02 | 0.01 | 0.163 |     | -0.04                   | 0.01                    |
| Race: Black <sup>b</sup>                    | 0.03  | 0.08 | 0.675 |     | -0.12                   | 0.18                    |
| Race: Hispanic <sup>b</sup>                 | 0.04  | 0.09 | 0.660 |     | -0.14                   | 0.22                    |
| Race: Other <sup>b,c</sup>                  | 0.06  | 0.11 | 0.591 |     | -0.15                   | 0.27                    |
| Parent Education: High School <sup>d</sup>  | 0.24  | 0.05 | 0.000 | *** | 0.14                    | 0.34                    |
| Parent Education: Some College <sup>d</sup> | 0.16  | 0.05 | 0.004 | **  | 0.05                    | 0.26                    |
| Gender: Female <sup>e</sup>                 | 0.10  | 0.04 | 0.019 | *   | 0.02                    | 0.18                    |
| Proportion of Households under Poverty      | 0.25  | 0.23 | 0.266 |     | -0.19                   | 0.70                    |
| No. of Household Members                    | -0.02 | 0.02 | 0.254 |     | -0.06                   | 0.02                    |
| Caregiver Smokes: Yes <sup>f</sup>          | 0.07  | 0.05 | 0.140 |     | -0.02                   | 0.17                    |

|                                        |       |      |       |     |       |       |
|----------------------------------------|-------|------|-------|-----|-------|-------|
| Epigenetic Assay: Batch 1 <sup>g</sup> | -0.26 | 0.13 | 0.057 |     | -0.52 | 0.01  |
| Epigenetic Assay: Batch 2 <sup>g</sup> | -0.23 | 0.14 | 0.093 |     | -0.50 | 0.04  |
| CD4T                                   | 1.03  | 1.38 | 0.458 |     | -1.71 | 3.76  |
| CD8T                                   | 1.16  | 1.34 | 0.391 |     | -1.50 | 3.82  |
| Bcell                                  | 1.10  | 1.62 | 0.499 |     | -2.11 | 4.30  |
| NK                                     | 6.05  | 1.58 | 0.000 | *** | 2.93  | 9.17  |
| Mono                                   | 6.90  | 1.77 | 0.000 | *** | 3.39  | 10.42 |
| Gran                                   | 5.89  | 1.34 | 0.000 | *** | 3.24  | 8.55  |

GrimAge

|                                             | b     | se   | p     |     | 95% CI<br>(Lower Limit) | 95% CI<br>(Upper Limit) |
|---------------------------------------------|-------|------|-------|-----|-------------------------|-------------------------|
| Any Loss in Childhood: Yes <sup>a</sup>     | 0.13  | 0.09 | 0.126 |     | -0.04                   | 0.30                    |
| Any Loss in Adulthood: Yes <sup>a</sup>     | 0.15  | 0.05 | 0.003 | **  | 0.05                    | 0.25                    |
| Age                                         | -0.05 | 0.01 | 0.000 | *** | -0.07                   | -0.03                   |
| Race: Black <sup>b</sup>                    | 0.30  | 0.07 | 0.000 | *** | 0.17                    | 0.44                    |
| Race: Hispanic <sup>b</sup>                 | -0.33 | 0.08 | 0.000 | *** | -0.49                   | -0.18                   |
| Race: Other <sup>b,c</sup>                  | 0.03  | 0.10 | 0.758 |     | -0.16                   | 0.22                    |
| Parent Education: High School <sup>d</sup>  | 0.38  | 0.06 | 0.000 | *** | 0.27                    | 0.50                    |
| Parent Education: Some College <sup>d</sup> | 0.27  | 0.05 | 0.000 | *** | 0.16                    | 0.37                    |
| Gender: Female <sup>e</sup>                 | -0.50 | 0.04 | 0.000 | *** | -0.58                   | -0.42                   |
| Proportion of Households under Poverty      | 0.60  | 0.24 | 0.015 | *   | 0.12                    | 1.09                    |
| No. of Household Members                    | 0.03  | 0.02 | 0.214 |     | -0.01                   | 0.06                    |
| Caregiver Smokes: Yes <sup>f</sup>          | 0.42  | 0.06 | 0.000 | *** | 0.31                    | 0.53                    |
| Epigenetic Assay: Batch 1 <sup>g</sup>      | -0.17 | 0.28 | 0.548 |     | -0.71                   | 0.38                    |
| Epigenetic Assay: Batch 2 <sup>g</sup>      | 0.22  | 0.27 | 0.403 |     | -0.31                   | 0.76                    |
| CD4T                                        | 1.77  | 1.19 | 0.141 |     | -0.60                   | 4.13                    |
| CD8T                                        | 1.01  | 1.18 | 0.394 |     | -1.33                   | 3.36                    |
| Bcell                                       | 0.63  | 1.43 | 0.660 |     | -2.20                   | 3.46                    |
| NK                                          | -0.82 | 1.36 | 0.549 |     | -3.51                   | 1.87                    |
| Mono                                        | 1.85  | 1.42 | 0.195 |     | -0.96                   | 4.66                    |
| Gran                                        | 3.72  | 1.14 | 0.001 | **  | 1.46                    | 5.97                    |

DunedinPACE

|                                         | b    | se   | p     |     | 95% CI<br>(Lower Limit) | 95% CI<br>(Upper Limit) |
|-----------------------------------------|------|------|-------|-----|-------------------------|-------------------------|
| Any Loss in Childhood: Yes <sup>a</sup> | 0.09 | 0.08 | 0.271 |     | -0.07                   | 0.26                    |
| Any Loss in Adulthood: Yes <sup>a</sup> | 0.14 | 0.04 | 0.002 | **  | 0.06                    | 0.23                    |
| Age                                     | 0.01 | 0.01 | 0.207 |     | -0.01                   | 0.04                    |
| Race: Black <sup>b</sup>                | 0.48 | 0.07 | 0.000 | *** | 0.34                    | 0.62                    |
| Race: Hispanic <sup>b</sup>             | 0.11 | 0.10 | 0.280 |     | -0.09                   | 0.30                    |
| Race: Other <sup>b,c</sup>              | 0.30 | 0.11 | 0.006 | **  | 0.09                    | 0.51                    |

|                                             |       |      |       |     |       |      |
|---------------------------------------------|-------|------|-------|-----|-------|------|
| Parent Education: High School <sup>d</sup>  | 0.46  | 0.05 | 0.000 | *** | 0.35  | 0.56 |
| Parent Education: Some College <sup>d</sup> | 0.26  | 0.05 | 0.000 | *** | 0.16  | 0.36 |
| Gender: Female <sup>e</sup>                 | 0.11  | 0.04 | 0.007 | **  | 0.03  | 0.19 |
| Proportion of Households under Poverty      | 0.73  | 0.23 | 0.002 | **  | 0.28  | 1.17 |
| No. of Household Members                    | 0.01  | 0.02 | 0.406 |     | -0.02 | 0.05 |
| Caregiver Smokes: Yes <sup>f</sup>          | 0.18  | 0.05 | 0.001 | *** | 0.08  | 0.28 |
| Epigenetic Assay: Batch 1 <sup>g</sup>      | 0.02  | 0.12 | 0.855 |     | -0.22 | 0.27 |
| Epigenetic Assay: Batch 2 <sup>g</sup>      | 0.09  | 0.12 | 0.465 |     | -0.15 | 0.32 |
| CD4T                                        | -1.30 | 1.39 | 0.352 |     | -4.06 | 1.46 |
| CD8T                                        | -1.85 | 1.32 | 0.162 |     | -4.46 | 0.76 |
| Bcell                                       | 3.78  | 1.55 | 0.016 | *   | 0.71  | 6.84 |
| NK                                          | -1.98 | 1.50 | 0.190 |     | -4.96 | 0.99 |
| Mono                                        | 0.98  | 1.50 | 0.514 |     | -1.99 | 3.96 |
| Gran                                        | 2.40  | 1.34 | 0.075 |     | -0.25 | 5.06 |

*Note:* a = No Loss (reference) b = White (reference); c = Asian, Native American, Pacific Islander, Other (other race or multi-racial); d = College or Higher reference; e = Male (reference); f = No (reference); g = Batch 3 (reference)

\* $p \leq 0.05$ ; \*\* $p \leq 0.01$ ; \*\*\* $p \leq 0.001$

NK - Natural Killer; Mono - Monocytes; Gran - Granulocytes

eTable 4. Parental Loss in Childhood and in Adulthood and Biological Aging (*n* = 3,963)

| Horvath                                      |       |      |       |     |                         |                         |
|----------------------------------------------|-------|------|-------|-----|-------------------------|-------------------------|
|                                              | b     | se   | p     |     | 95% CI<br>(Lower Limit) | 95% CI<br>(Upper Limit) |
| Parental Loss in Childhood: Yes <sup>a</sup> | -0.05 | 0.08 | 0.508 |     | -0.21                   | 0.11                    |
| Parental Loss in Adulthood: Yes <sup>a</sup> | 0.02  | 0.05 | 0.658 |     | -0.08                   | 0.12                    |
| Age                                          | -0.02 | 0.01 | 0.133 |     | -0.04                   | 0.01                    |
| Race: Black <sup>b</sup>                     | 0.00  | 0.08 | 0.999 |     | -0.16                   | 0.16                    |
| Race: Hispanic <sup>b</sup>                  | -0.18 | 0.10 | 0.077 |     | -0.39                   | 0.02                    |
| Race: Other <sup>b,c</sup>                   | 0.02  | 0.08 | 0.794 |     | -0.15                   | 0.19                    |
| Parent Education: High School <sup>d</sup>   | 0.15  | 0.06 | 0.016 | *   | 0.03                    | 0.27                    |
| Parent Education: Some College <sup>d</sup>  | 0.06  | 0.05 | 0.214 |     | -0.04                   | 0.16                    |
| Gender: Female <sup>e</sup>                  | -0.34 | 0.05 | 0.000 | *** | -0.43                   | -0.25                   |
| Proportion of Households under Poverty       | 0.07  | 0.19 | 0.724 |     | -0.31                   | 0.44                    |
| No. of Household Members                     | 0.01  | 0.02 | 0.701 |     | -0.03                   | 0.05                    |
| Caregiver Smokes: Yes <sup>f</sup>           | -0.08 | 0.06 | 0.143 |     | -0.19                   | 0.03                    |
| Epigenetic Assay: Batch 1 <sup>g</sup>       | 0.27  | 0.20 | 0.193 |     | -0.14                   | 0.67                    |
| Epigenetic Assay: Batch 2 <sup>g</sup>       | 0.40  | 0.20 | 0.051 |     | 0.00                    | 0.80                    |
| CD4T                                         | -0.89 | 1.40 | 0.526 |     | -3.68                   | 1.89                    |
| CD8T                                         | 3.67  | 1.45 | 0.013 | *   | 0.80                    | 6.55                    |
| Bcell                                        | 0.37  | 1.37 | 0.787 |     | -2.34                   | 3.08                    |
| NK                                           | 3.16  | 1.64 | 0.056 |     | -0.09                   | 6.40                    |
| Mono                                         | -0.94 | 1.74 | 0.590 |     | -4.39                   | 2.51                    |
| Gran                                         | 1.44  | 1.33 | 0.283 |     | -1.20                   | 4.08                    |
| PhenoAge                                     |       |      |       |     |                         |                         |
|                                              | b     | se   | p     |     | 95% CI<br>(Lower Limit) | 95% CI<br>(Upper Limit) |
| Parental Loss in Childhood: Yes <sup>a</sup> | 0.10  | 0.08 | 0.182 |     | -0.05                   | 0.25                    |
| Parental Loss in Adulthood: Yes <sup>a</sup> | 0.10  | 0.05 | 0.043 | *   | 0.00                    | 0.19                    |
| Age                                          | -0.02 | 0.01 | 0.157 |     | -0.04                   | 0.01                    |
| Race: Black <sup>b</sup>                     | 0.03  | 0.08 | 0.662 |     | -0.12                   | 0.18                    |
| Race: Hispanic <sup>b</sup>                  | 0.04  | 0.09 | 0.678 |     | -0.14                   | 0.22                    |
| Race: Other <sup>b,c</sup>                   | 0.06  | 0.11 | 0.599 |     | -0.15                   | 0.26                    |
| Parent Education: High School <sup>d</sup>   | 0.24  | 0.05 | 0.000 | *** | 0.14                    | 0.34                    |
| Parent Education: Some College <sup>d</sup>  | 0.16  | 0.05 | 0.004 | **  | 0.05                    | 0.26                    |
| Gender: Female <sup>e</sup>                  | 0.10  | 0.04 | 0.017 | *   | 0.02                    | 0.18                    |
| Proportion of Households under Poverty       | 0.26  | 0.23 | 0.252 |     | -0.19                   | 0.71                    |
| No. of Household Members                     | -0.02 | 0.02 | 0.271 |     | -0.06                   | 0.02                    |
| Caregiver Smokes: Yes <sup>f</sup>           | 0.07  | 0.05 | 0.136 |     | -0.02                   | 0.17                    |
| Epigenetic Assay: Batch 1 <sup>g</sup>       | -0.26 | 0.13 | 0.052 |     | -0.53                   | 0.00                    |

|                                        |       |      |       |     |       |       |
|----------------------------------------|-------|------|-------|-----|-------|-------|
| Epigenetic Assay: Batch 2 <sup>g</sup> | -0.24 | 0.14 | 0.085 |     | -0.51 | 0.03  |
| CD4T                                   | 1.04  | 1.38 | 0.452 |     | -1.69 | 3.78  |
| CD8T                                   | 1.17  | 1.34 | 0.385 |     | -1.49 | 3.83  |
| Bcell                                  | 1.15  | 1.62 | 0.481 |     | -2.07 | 4.36  |
| NK                                     | 6.06  | 1.58 | 0.000 | *** | 2.93  | 9.18  |
| Mono                                   | 6.91  | 1.77 | 0.000 | *** | 3.40  | 10.41 |
| Gran                                   | 5.91  | 1.34 | 0.000 | *** | 3.25  | 8.56  |

#### GrimAge

|                                              | b     | se   | p     |     | 95% CI<br>(Lower Limit) | 95% CI<br>(Upper Limit) |
|----------------------------------------------|-------|------|-------|-----|-------------------------|-------------------------|
| Parental Loss in Childhood: Yes <sup>a</sup> | 0.12  | 0.10 | 0.196 |     | -0.07                   | 0.31                    |
| Parental Loss in Adulthood: Yes <sup>a</sup> | 0.15  | 0.05 | 0.003 | **  | 0.05                    | 0.25                    |
| Age                                          | -0.05 | 0.01 | 0.000 | *** | -0.07                   | -0.03                   |
| Race: Black <sup>b</sup>                     | 0.31  | 0.07 | 0.000 | *** | 0.17                    | 0.44                    |
| Race: Hispanic <sup>b</sup>                  | -0.34 | 0.08 | 0.000 | *** | -0.49                   | -0.18                   |
| Race: Other <sup>b,c</sup>                   | 0.03  | 0.10 | 0.775 |     | -0.16                   | 0.22                    |
| Parent Education: High School <sup>d</sup>   | 0.38  | 0.06 | 0.000 | *** | 0.27                    | 0.50                    |
| Parent Education: Some College <sup>d</sup>  | 0.27  | 0.05 | 0.000 | *** | 0.16                    | 0.37                    |
| Gender: Female <sup>e</sup>                  | -0.50 | 0.04 | 0.000 | *** | -0.58                   | -0.42                   |
| Proportion of Households under Poverty       | 0.62  | 0.25 | 0.014 | *   | 0.13                    | 1.11                    |
| No. of Household Members                     | 0.03  | 0.02 | 0.204 |     | -0.01                   | 0.07                    |
| Caregiver Smokes: Yes <sup>f</sup>           | 0.42  | 0.06 | 0.000 | *** | 0.31                    | 0.53                    |
| Epigenetic Assay: Batch 1 <sup>g</sup>       | -0.17 | 0.27 | 0.530 |     | -0.71                   | 0.37                    |
| Epigenetic Assay: Batch 2 <sup>g</sup>       | 0.22  | 0.27 | 0.414 |     | -0.31                   | 0.74                    |
| CD4T                                         | 1.77  | 1.19 | 0.138 |     | -0.58                   | 4.12                    |
| CD8T                                         | 1.03  | 1.17 | 0.382 |     | -1.29                   | 3.35                    |
| Bcell                                        | 0.66  | 1.43 | 0.643 |     | -2.16                   | 3.49                    |
| NK                                           | -0.83 | 1.35 | 0.539 |     | -3.51                   | 1.84                    |
| Mono                                         | 1.84  | 1.42 | 0.196 |     | -0.96                   | 4.64                    |
| Gran                                         | 3.72  | 1.13 | 0.001 | **  | 1.48                    | 5.96                    |

#### DunedinPACE

|                                              | b    | se   | p     |     | 95% CI<br>(Lower Limit) | 95% CI<br>(Upper Limit) |
|----------------------------------------------|------|------|-------|-----|-------------------------|-------------------------|
| Parental Loss in Childhood: Yes <sup>a</sup> | 0.10 | 0.09 | 0.280 |     | -0.08                   | 0.27                    |
| Parental Loss in Adulthood: Yes <sup>a</sup> | 0.16 | 0.04 | 0.000 | *** | 0.07                    | 0.25                    |
| Age                                          | 0.01 | 0.01 | 0.210 |     | -0.01                   | 0.04                    |
| Race: Black <sup>b</sup>                     | 0.48 | 0.07 | 0.000 | *** | 0.34                    | 0.62                    |
| Race: Hispanic <sup>b</sup>                  | 0.11 | 0.10 | 0.295 |     | -0.09                   | 0.30                    |
| Race: Other <sup>b,c</sup>                   | 0.29 | 0.10 | 0.006 | **  | 0.09                    | 0.50                    |
| Parent Education: High School <sup>d</sup>   | 0.46 | 0.05 | 0.000 | *** | 0.35                    | 0.56                    |
| Parent Education: Some College <sup>d</sup>  | 0.26 | 0.05 | 0.000 | *** | 0.16                    | 0.36                    |

|                                        |       |      |       |     |       |      |
|----------------------------------------|-------|------|-------|-----|-------|------|
| Gender: Female <sup>e</sup>            | 0.11  | 0.04 | 0.007 | **  | 0.03  | 0.19 |
| Proportion of Households under Poverty | 0.74  | 0.23 | 0.002 | **  | 0.29  | 1.18 |
| No. of Household Members               | 0.02  | 0.02 | 0.380 |     | -0.02 | 0.05 |
| Caregiver Smokes: Yes <sup>f</sup>     | 0.18  | 0.05 | 0.001 | *** | 0.08  | 0.28 |
| Epigenetic Assay: Batch 1 <sup>g</sup> | 0.01  | 0.12 | 0.909 |     | -0.23 | 0.25 |
| Epigenetic Assay: Batch 2 <sup>g</sup> | 0.08  | 0.12 | 0.506 |     | -0.15 | 0.31 |
| CD4T                                   | -1.30 | 1.39 | 0.353 |     | -4.05 | 1.46 |
| CD8T                                   | -1.83 | 1.31 | 0.164 |     | -4.42 | 0.76 |
| Bcell                                  | 3.81  | 1.54 | 0.015 | *   | 0.75  | 6.87 |
| NK                                     | -1.99 | 1.50 | 0.188 |     | -4.96 | 0.98 |
| Mono                                   | 0.98  | 1.50 | 0.515 |     | -1.99 | 3.95 |
| Gran                                   | 2.41  | 1.34 | 0.074 |     | -0.23 | 5.06 |

*Note:* a = No Loss (reference) b = White (reference); Asian, Native American, Pacific Islander, Other (other race or multi-racial); d = College or Higher reference; e = Male (reference); f = No (reference); g = Batch 3 (reference)

\* $p \leq 0.05$ ; \*\* $p \leq 0.01$ ; \*\*\* $p \leq 0.001$

NK - Natural Killer; Mono - Monocytes; Gran - Granulocytes

eTable 5. Count of Losses and Biological Aging ( $n = 3,921$ )

| Horvath                                     |       |      |       |                         |                         |       |
|---------------------------------------------|-------|------|-------|-------------------------|-------------------------|-------|
|                                             | b     | se   | p     | 95% CI<br>(Lower Limit) | 95% CI<br>(Upper Limit) |       |
| One Loss: Yes <sup>a</sup>                  | -0.03 | 0.05 | 0.562 | -0.14                   | 0.08                    |       |
| Two or More Losses: Yes <sup>a</sup>        | -0.12 | 0.09 | 0.215 | -0.30                   | 0.07                    |       |
| Age                                         | -0.02 | 0.01 | 0.212 | -0.04                   | 0.01                    |       |
| Race: Black <sup>b</sup>                    | -0.02 | 0.08 | 0.835 | -0.17                   | 0.14                    |       |
| Race: Hispanic <sup>b</sup>                 | -0.16 | 0.10 | 0.106 | -0.36                   | 0.03                    |       |
| Race: Other <sup>b,c</sup>                  | 0.05  | 0.10 | 0.607 | -0.15                   | 0.26                    |       |
| Parent Education: High School <sup>d</sup>  | 0.13  | 0.06 | 0.045 | *                       | 0.00                    | 0.25  |
| Parent Education: Some College <sup>d</sup> | 0.02  | 0.05 | 0.692 | -0.08                   | 0.11                    |       |
| Gender: Female <sup>e</sup>                 | -0.37 | 0.04 | 0.000 | ***                     | -0.45                   | -0.29 |
| Proportion of Households under Poverty      | 0.12  | 0.20 | 0.543 | -0.27                   | 0.52                    |       |
| No. of Household Members                    | 0.01  | 0.02 | 0.468 | -0.03                   | 0.06                    |       |
| Caregiver Smokes: Yes <sup>f</sup>          | -0.07 | 0.06 | 0.241 | -0.19                   | 0.05                    |       |
| Epigenetic Assay: Batch 1 <sup>g</sup>      | 0.33  | 0.24 | 0.160 | -0.13                   | 0.80                    |       |
| Epigenetic Assay: Batch 2 <sup>g</sup>      | 0.40  | 0.23 | 0.084 | -0.06                   | 0.86                    |       |
| Time Since Loss                             | 0.00  | 0.00 | 0.480 | -0.01                   | 0.01                    |       |
| PhenoAge                                    |       |      |       |                         |                         |       |
|                                             | b     | se   | p     | 95% CI<br>(Lower Limit) | 95% CI<br>(Upper Limit) |       |
| One Loss: Yes <sup>a</sup>                  | 0.04  | 0.06 | 0.529 | -0.09                   | 0.17                    |       |
| Two or More Losses: Yes <sup>a</sup>        | 0.09  | 0.08 | 0.274 | -0.07                   | 0.25                    |       |
| Age                                         | -0.01 | 0.01 | 0.505 | -0.03                   | 0.02                    |       |
| Race: Black <sup>b</sup>                    | -0.20 | 0.07 | 0.006 | **                      | -0.34                   | -0.06 |
| Race: Hispanic <sup>b</sup>                 | -0.04 | 0.10 | 0.684 | -0.24                   | 0.16                    |       |
| Race: Other <sup>b,c</sup>                  | -0.05 | 0.13 | 0.689 | -0.32                   | 0.21                    |       |
| Parent Education: High School <sup>d</sup>  | 0.27  | 0.05 | 0.000 | ***                     | 0.16                    | 0.37  |
| Parent Education: Some College <sup>d</sup> | 0.17  | 0.06 | 0.006 | **                      | 0.05                    | 0.29  |
| Gender: Female <sup>e</sup>                 | 0.10  | 0.04 | 0.010 | *                       | 0.03                    | 0.18  |
| Proportion of Households under Poverty      | 0.17  | 0.24 | 0.462 | -0.29                   | 0.64                    |       |
| No. of Household Members                    | -0.01 | 0.02 | 0.612 | -0.05                   | 0.03                    |       |
| Caregiver Smokes: Yes <sup>f</sup>          | 0.08  | 0.05 | 0.138 | -0.02                   | 0.18                    |       |
| Epigenetic Assay: Batch 1 <sup>g</sup>      | -0.15 | 0.15 | 0.338 | -0.45                   | 0.15                    |       |
| Epigenetic Assay: Batch 2 <sup>g</sup>      | -0.16 | 0.16 | 0.322 | -0.46                   | 0.15                    |       |
| Time Since Loss                             | 0.01  | 0.00 | 0.176 | 0.00                    | 0.01                    |       |
| GrimAge                                     |       |      |       |                         |                         |       |

|                                             | b     | se   | p     |     | 95% CI<br>(Lower Limit) | 95% CI<br>(Upper Limit) |
|---------------------------------------------|-------|------|-------|-----|-------------------------|-------------------------|
| One Loss: Yes <sup>a</sup>                  | 0.17  | 0.07 | 0.011 | *   | 0.04                    | 0.31                    |
| Two or More Losses: Yes <sup>a</sup>        | 0.24  | 0.09 | 0.011 | *   | 0.06                    | 0.43                    |
| Age                                         | -0.05 | 0.01 | 0.000 | *** | -0.08                   | -0.03                   |
| Race: Black <sup>b</sup>                    | 0.12  | 0.06 | 0.075 |     | -0.01                   | 0.24                    |
| Race: Hispanic <sup>b</sup>                 | -0.42 | 0.09 | 0.000 | *** | -0.59                   | -0.24                   |
| Race: Other <sup>b,c</sup>                  | -0.06 | 0.10 | 0.503 |     | -0.25                   | 0.12                    |
| Parent Education: High School <sup>d</sup>  | 0.41  | 0.06 | 0.000 | *** | 0.29                    | 0.53                    |
| Parent Education: Some College <sup>d</sup> | 0.29  | 0.05 | 0.000 | *** | 0.18                    | 0.40                    |
| Gender: Female <sup>e</sup>                 | -0.39 | 0.04 | 0.000 | *** | -0.47                   | -0.30                   |
| Proportion of Households under Poverty      | 0.46  | 0.25 | 0.063 |     | -0.02                   | 0.95                    |
| No. of Household Members                    | 0.02  | 0.02 | 0.294 |     | -0.02                   | 0.07                    |
| Caregiver Smokes: Yes <sup>f</sup>          | 0.44  | 0.06 | 0.000 | *** | 0.33                    | 0.55                    |
| Epigenetic Assay: Batch 1 <sup>g</sup>      | -0.17 | 0.28 | 0.556 |     | -0.72                   | 0.39                    |
| Epigenetic Assay: Batch 2 <sup>g</sup>      | 0.21  | 0.28 | 0.456 |     | -0.34                   | 0.75                    |
| Time Since Loss                             | 0.00  | 0.00 | 0.873 |     | -0.01                   | 0.01                    |

DunedinPACE

|                                             | b    | se   | p     |     | 95% CI<br>(Lower Limit) | 95% CI<br>(Upper Limit) |
|---------------------------------------------|------|------|-------|-----|-------------------------|-------------------------|
| One Loss: Yes <sup>a</sup>                  | 0.17 | 0.06 | 0.010 | *   | 0.04                    | 0.30                    |
| Two or More Losses: Yes <sup>a</sup>        | 0.21 | 0.07 | 0.006 | **  | 0.06                    | 0.35                    |
| Age                                         | 0.02 | 0.01 | 0.144 |     | -0.01                   | 0.04                    |
| Race: Black <sup>b</sup>                    | 0.35 | 0.06 | 0.000 | *** | 0.22                    | 0.48                    |
| Race: Hispanic <sup>b</sup>                 | 0.06 | 0.11 | 0.546 |     | -0.15                   | 0.27                    |
| Race: Other <sup>b,c</sup>                  | 0.25 | 0.12 | 0.033 | *   | 0.02                    | 0.48                    |
| Parent Education: High School <sup>d</sup>  | 0.51 | 0.05 | 0.000 | *** | 0.40                    | 0.62                    |
| Parent Education: Some College <sup>d</sup> | 0.29 | 0.05 | 0.000 | *** | 0.19                    | 0.40                    |
| Gender: Female <sup>e</sup>                 | 0.17 | 0.04 | 0.000 | *** | 0.09                    | 0.26                    |
| Proportion of Households under Poverty      | 0.63 | 0.23 | 0.007 | **  | 0.18                    | 1.09                    |
| No. of Household Members                    | 0.02 | 0.02 | 0.404 |     | -0.02                   | 0.05                    |
| Caregiver Smokes: Yes <sup>f</sup>          | 0.19 | 0.06 | 0.002 | **  | 0.07                    | 0.30                    |
| Epigenetic Assay: Batch 1 <sup>g</sup>      | 0.06 | 0.12 | 0.613 |     | -0.18                   | 0.31                    |
| Epigenetic Assay: Batch 2 <sup>g</sup>      | 0.14 | 0.12 | 0.244 |     | -0.10                   | 0.38                    |
| Time Since Loss                             | 0.00 | 0.00 | 0.956 |     | -0.01                   | 0.01                    |

Note: a = No Loss (reference) b = White (reference); c = Asian, Native American, Pacific Islander, Other (other race or multi-racial); d = College or Higher reference; e = Male (reference); f = No (reference); g = Batch 3 (reference)

\* $p \leq 0.05$ ; \*\* $p \leq 0.01$ ; \*\*\* $p \leq 0.001$



eTable 6. Parental Loss at Any Time Period (Childhood to Adulthood) and Biological Aging (*n* = 3,921)

| Horvath                                     |       |      |       |                         |                         |       |
|---------------------------------------------|-------|------|-------|-------------------------|-------------------------|-------|
|                                             | b     | se   | p     | 95% CI<br>(Lower Limit) | 95% CI<br>(Upper Limit) |       |
| Parental Loss: Yes <sup>a</sup>             | -0.01 | 0.06 | 0.930 | -0.13                   | 0.12                    |       |
| Age                                         | -0.02 | 0.01 | 0.177 | -0.04                   | 0.01                    |       |
| Race: Black <sup>b</sup>                    | -0.02 | 0.08 | 0.773 | -0.18                   | 0.13                    |       |
| Race: Hispanic <sup>b</sup>                 | -0.16 | 0.10 | 0.116 | -0.35                   | 0.04                    |       |
| Race: Other <sup>b,c</sup>                  | 0.05  | 0.10 | 0.605 | -0.15                   | 0.26                    |       |
| Parent Education: High School <sup>d</sup>  | 0.12  | 0.06 | 0.055 | 0.00                    | 0.24                    |       |
| Parent Education: Some College <sup>d</sup> | 0.02  | 0.05 | 0.747 | -0.08                   | 0.11                    |       |
| Gender: Female <sup>e</sup>                 | -0.37 | 0.04 | 0.000 | ***                     | -0.45                   | -0.29 |
| Proportion of Households under Poverty      | 0.11  | 0.20 | 0.592 | -0.29                   | 0.50                    |       |
| No. of Household Members                    | 0.01  | 0.02 | 0.476 | -0.03                   | 0.06                    |       |
| Caregiver Smokes: Yes <sup>f</sup>          | -0.07 | 0.06 | 0.214 | -0.19                   | 0.04                    |       |
| Epigenetic Assay: Batch 1 <sup>g</sup>      | 0.33  | 0.24 | 0.167 | -0.14                   | 0.79                    |       |
| Epigenetic Assay: Batch 2 <sup>g</sup>      | 0.40  | 0.23 | 0.089 | -0.06                   | 0.85                    |       |
| Time Since Loss                             | 0.00  | 0.00 | 0.919 | -0.01                   | 0.01                    |       |
| PhenoAge                                    |       |      |       |                         |                         |       |
|                                             | b     | se   | p     | 95% CI<br>(Lower Limit) | 95% CI<br>(Upper Limit) |       |
| Parental Loss: Yes <sup>a</sup>             | 0.06  | 0.07 | 0.349 | -0.07                   | 0.20                    |       |
| Age                                         | -0.01 | 0.01 | 0.519 | -0.03                   | 0.02                    |       |
| Race: Black <sup>b</sup>                    | -0.20 | 0.07 | 0.007 | **                      | -0.34                   | -0.06 |
| Race: Hispanic <sup>b</sup>                 | -0.04 | 0.10 | 0.674 | -0.25                   | 0.16                    |       |
| Race: Other <sup>b,c</sup>                  | -0.05 | 0.14 | 0.687 | -0.32                   | 0.21                    |       |
| Parent Education: High School <sup>d</sup>  | 0.27  | 0.05 | 0.000 | ***                     | 0.16                    | 0.38  |
| Parent Education: Some College <sup>d</sup> | 0.17  | 0.06 | 0.005 | **                      | 0.05                    | 0.29  |
| Gender: Female <sup>e</sup>                 | 0.10  | 0.04 | 0.011 | *                       | 0.02                    | 0.19  |
| Proportion of Households under Poverty      | 0.18  | 0.24 | 0.451 | -0.29                   | 0.65                    |       |
| No. of Household Members                    | -0.01 | 0.02 | 0.644 | -0.05                   | 0.03                    |       |
| Caregiver Smokes: Yes <sup>f</sup>          | 0.08  | 0.05 | 0.140 | -0.03                   | 0.18                    |       |
| Epigenetic Assay: Batch 1 <sup>g</sup>      | -0.15 | 0.15 | 0.332 | -0.45                   | 0.15                    |       |
| Epigenetic Assay: Batch 2 <sup>g</sup>      | -0.16 | 0.16 | 0.312 | -0.47                   | 0.15                    |       |
| Time Since Loss                             | 0.00  | 0.00 | 0.264 | 0.00                    | 0.01                    |       |
| GrimAge                                     |       |      |       |                         |                         |       |

|                                             | b     | se   | p     |     | 95% CI<br>(Lower Limit) | 95% CI<br>(Upper Limit) |
|---------------------------------------------|-------|------|-------|-----|-------------------------|-------------------------|
| Parental Loss: Yes <sup>a</sup>             | 0.20  | 0.07 | 0.006 | **  | 0.06                    | 0.34                    |
| Age                                         | -0.05 | 0.01 | 0.000 | *** | -0.08                   | -0.03                   |
| Race: Black <sup>b</sup>                    | 0.12  | 0.06 | 0.057 |     | 0.00                    | 0.25                    |
| Race: Hispanic <sup>b</sup>                 | -0.41 | 0.09 | 0.000 | *** | -0.60                   | -0.23                   |
| Race: Other <sup>b,c</sup>                  | -0.06 | 0.10 | 0.513 |     | -0.25                   | 0.13                    |
| Parent Education: High School <sup>d</sup>  | 0.42  | 0.06 | 0.000 | *** | 0.30                    | 0.55                    |
| Parent Education: Some College <sup>d</sup> | 0.29  | 0.05 | 0.000 | *** | 0.19                    | 0.40                    |
| Gender: Female <sup>e</sup>                 | -0.39 | 0.04 | 0.000 | *** | -0.47                   | -0.30                   |
| Proportion of Households under Poverty      | 0.47  | 0.25 | 0.060 |     | -0.02                   | 0.96                    |
| No. of Household Members                    | 0.03  | 0.02 | 0.251 |     | -0.02                   | 0.07                    |
| Caregiver Smokes: Yes <sup>f</sup>          | 0.44  | 0.06 | 0.000 | *** | 0.33                    | 0.55                    |
| Epigenetic Assay: Batch 1 <sup>g</sup>      | -0.17 | 0.28 | 0.533 |     | -0.72                   | 0.38                    |
| Epigenetic Assay: Batch 2 <sup>g</sup>      | 0.20  | 0.27 | 0.472 |     | -0.34                   | 0.74                    |
| Time Since Loss                             | 0.00  | 0.00 | 0.960 |     | -0.01                   | 0.01                    |

DunedinPACE

|                                             | b    | se   | p     |     | 95% CI<br>(Lower Limit) | 95% CI<br>(Upper Limit) |
|---------------------------------------------|------|------|-------|-----|-------------------------|-------------------------|
| Parental Loss: Yes <sup>a</sup>             | 0.21 | 0.07 | 0.003 | **  | 0.07                    | 0.35                    |
| Age                                         | 0.02 | 0.01 | 0.134 |     | -0.01                   | 0.04                    |
| Race: Black <sup>b</sup>                    | 0.35 | 0.06 | 0.000 | *** | 0.22                    | 0.48                    |
| Race: Hispanic <sup>b</sup>                 | 0.07 | 0.11 | 0.553 |     | -0.15                   | 0.29                    |
| Race: Other <sup>b,c</sup>                  | 0.25 | 0.12 | 0.032 | *   | 0.02                    | 0.49                    |
| Parent Education: High School <sup>d</sup>  | 0.52 | 0.06 | 0.000 | *** | 0.41                    | 0.63                    |
| Parent Education: Some College <sup>d</sup> | 0.30 | 0.05 | 0.000 | *** | 0.19                    | 0.40                    |
| Gender: Female <sup>e</sup>                 | 0.17 | 0.04 | 0.000 | *** | 0.09                    | 0.26                    |
| Proportion of Households under Poverty      | 0.64 | 0.23 | 0.007 | **  | 0.18                    | 1.09                    |
| No. of Household Members                    | 0.02 | 0.02 | 0.341 |     | -0.02                   | 0.06                    |
| Caregiver Smokes: Yes <sup>f</sup>          | 0.19 | 0.06 | 0.002 | **  | 0.07                    | 0.30                    |
| Epigenetic Assay: Batch 1 <sup>g</sup>      | 0.05 | 0.12 | 0.673 |     | -0.19                   | 0.30                    |
| Epigenetic Assay: Batch 2 <sup>g</sup>      | 0.13 | 0.12 | 0.287 |     | -0.11                   | 0.36                    |
| Time Since Loss                             | 0.00 | 0.00 | 0.681 |     | -0.01                   | 0.01                    |

Note: a = No Loss (reference) b = White (reference); c = Asian, Native American, Pacific Islander, Other (other race or multi-racial); d = College or Higher reference; e = Male (reference); f = No (reference); g = Batch 3 (reference)

\* $p \leq 0.05$ ; \*\* $p \leq 0.01$ ; \*\*\* $p \leq 0.001$

eTable 7. Any Loss in Childhood and in Adulthood and Biological Aging (*n* = 3,921)

| Horvath                                     |       |      |       |                         |                         |       |
|---------------------------------------------|-------|------|-------|-------------------------|-------------------------|-------|
|                                             | b     | se   | p     | 95% CI<br>(Lower Limit) | 95% CI<br>(Upper Limit) |       |
| Any Loss in Childhood: Yes <sup>a</sup>     | -0.17 | 0.12 | 0.160 | -0.40                   | 0.07                    |       |
| Any Loss in Adulthood: Yes <sup>a</sup>     | -0.04 | 0.05 | 0.445 | -0.15                   | 0.07                    |       |
| Age                                         | -0.02 | 0.01 | 0.161 | -0.04                   | 0.01                    |       |
| Race: Black <sup>b</sup>                    | -0.02 | 0.08 | 0.791 | -0.18                   | 0.13                    |       |
| Race: Hispanic <sup>b</sup>                 | -0.16 | 0.10 | 0.114 | -0.35                   | 0.04                    |       |
| Race: Other <sup>b,c</sup>                  | 0.06  | 0.10 | 0.591 | -0.15                   | 0.26                    |       |
| Parent Education: High School <sup>d</sup>  | 0.12  | 0.06 | 0.050 | *                       | 0.00                    | 0.25  |
| Parent Education: Some College <sup>d</sup> | 0.01  | 0.05 | 0.758 | -0.08                   | 0.11                    |       |
| Gender: Female <sup>e</sup>                 | -0.37 | 0.04 | 0.000 | ***                     | -0.45                   | -0.29 |
| Proportion of Households under Poverty      | 0.12  | 0.20 | 0.542 | -0.27                   | 0.51                    |       |
| No. of Household Members                    | 0.01  | 0.02 | 0.478 | -0.03                   | 0.06                    |       |
| Caregiver Smokes: Yes <sup>f</sup>          | -0.07 | 0.06 | 0.246 | -0.19                   | 0.05                    |       |
| Epigenetic Assay: Batch 1 <sup>g</sup>      | 0.33  | 0.24 | 0.170 | -0.14                   | 0.79                    |       |
| Epigenetic Assay: Batch 2 <sup>g</sup>      | 0.40  | 0.23 | 0.091 | -0.06                   | 0.86                    |       |
| Time Since Loss                             | 0.01  | 0.00 | 0.242 | 0.00                    | 0.02                    |       |
| PhenoAge                                    |       |      |       |                         |                         |       |
|                                             | b     | se   | p     | 95% CI<br>(Lower Limit) | 95% CI<br>(Upper Limit) |       |
| Any Loss in Childhood: Yes <sup>a</sup>     | -0.09 | 0.12 | 0.428 | -0.32                   | 0.14                    |       |
| Any Loss in Adulthood: Yes <sup>a</sup>     | 0.03  | 0.06 | 0.604 | -0.08                   | 0.14                    |       |
| Age                                         | -0.01 | 0.01 | 0.484 | -0.03                   | 0.02                    |       |
| Race: Black <sup>b</sup>                    | -0.20 | 0.07 | 0.007 | **                      | -0.34                   | -0.06 |
| Race: Hispanic <sup>b</sup>                 | -0.04 | 0.10 | 0.679 | -0.25                   | 0.16                    |       |
| Race: Other <sup>b,c</sup>                  | -0.05 | 0.14 | 0.697 | -0.32                   | 0.22                    |       |
| Parent Education: High School <sup>d</sup>  | 0.27  | 0.05 | 0.000 | ***                     | 0.16                    | 0.38  |
| Parent Education: Some College <sup>d</sup> | 0.17  | 0.06 | 0.006 | **                      | 0.05                    | 0.29  |
| Gender: Female <sup>e</sup>                 | 0.11  | 0.04 | 0.010 | *                       | 0.03                    | 0.18  |
| Proportion of Households under Poverty      | 0.18  | 0.24 | 0.440 | -0.28                   | 0.65                    |       |
| No. of Household Members                    | -0.01 | 0.02 | 0.638 | -0.05                   | 0.03                    |       |
| Caregiver Smokes: Yes <sup>f</sup>          | 0.08  | 0.05 | 0.124 | -0.02                   | 0.18                    |       |
| Epigenetic Assay: Batch 1 <sup>g</sup>      | -0.15 | 0.15 | 0.336 | -0.45                   | 0.15                    |       |
| Epigenetic Assay: Batch 2 <sup>g</sup>      | -0.16 | 0.16 | 0.319 | -0.47                   | 0.15                    |       |
| Time Since Loss                             | 0.01  | 0.00 | 0.043 | *                       | 0.00                    | 0.02  |
| GrimAge                                     |       |      |       |                         |                         |       |

|                                             | b     | se   | p     |     | 95% CI<br>(Lower Limit) | 95% CI<br>(Upper Limit) |
|---------------------------------------------|-------|------|-------|-----|-------------------------|-------------------------|
| Any Loss in Childhood: Yes <sup>a</sup>     | 0.06  | 0.11 | 0.554 |     | -0.15                   | 0.27                    |
| Any Loss in Adulthood: Yes <sup>a</sup>     | 0.16  | 0.06 | 0.008 | **  | 0.04                    | 0.28                    |
| Age                                         | -0.05 | 0.01 | 0.000 | *** | -0.08                   | -0.03                   |
| Race: Black <sup>b</sup>                    | 0.12  | 0.06 | 0.056 |     | 0.00                    | 0.25                    |
| Race: Hispanic <sup>b</sup>                 | -0.41 | 0.09 | 0.000 | *** | -0.59                   | -0.23                   |
| Race: Other <sup>b,c</sup>                  | -0.06 | 0.10 | 0.521 |     | -0.25                   | 0.13                    |
| Parent Education: High School <sup>d</sup>  | 0.42  | 0.06 | 0.000 | *** | 0.30                    | 0.54                    |
| Parent Education: Some College <sup>d</sup> | 0.29  | 0.05 | 0.000 | *** | 0.19                    | 0.40                    |
| Gender: Female <sup>e</sup>                 | -0.39 | 0.04 | 0.000 | *** | -0.47                   | -0.30                   |
| Proportion of Households under Poverty      | 0.46  | 0.25 | 0.065 |     | -0.03                   | 0.95                    |
| No. of Household Members                    | 0.02  | 0.02 | 0.259 |     | -0.02                   | 0.07                    |
| Caregiver Smokes: Yes <sup>f</sup>          | 0.44  | 0.06 | 0.000 | *** | 0.33                    | 0.55                    |
| Epigenetic Assay: Batch 1 <sup>g</sup>      | -0.17 | 0.28 | 0.552 |     | -0.72                   | 0.39                    |
| Epigenetic Assay: Batch 2 <sup>g</sup>      | 0.21  | 0.28 | 0.458 |     | -0.34                   | 0.75                    |
| Time Since Loss                             | 0.00  | 0.00 | 0.439 |     | -0.01                   | 0.01                    |

DunedinPACE

|                                             | b    | se   | p     |     | 95% CI<br>(Lower Limit) | 95% CI<br>(Upper Limit) |
|---------------------------------------------|------|------|-------|-----|-------------------------|-------------------------|
| Any Loss in Childhood: Yes <sup>a</sup>     | 0.00 | 0.10 | 0.995 |     | -0.20                   | 0.20                    |
| Any Loss in Adulthood: Yes <sup>a</sup>     | 0.13 | 0.06 | 0.027 | *   | 0.01                    | 0.24                    |
| Age                                         | 0.02 | 0.01 | 0.147 |     | -0.01                   | 0.04                    |
| Race: Black <sup>b</sup>                    | 0.35 | 0.06 | 0.000 | *** | 0.23                    | 0.48                    |
| Race: Hispanic <sup>b</sup>                 | 0.07 | 0.11 | 0.529 |     | -0.15                   | 0.29                    |
| Race: Other <sup>b,c</sup>                  | 0.26 | 0.12 | 0.033 | *   | 0.02                    | 0.49                    |
| Parent Education: High School <sup>d</sup>  | 0.52 | 0.06 | 0.000 | *** | 0.41                    | 0.63                    |
| Parent Education: Some College <sup>d</sup> | 0.30 | 0.05 | 0.000 | *** | 0.19                    | 0.40                    |
| Gender: Female <sup>e</sup>                 | 0.17 | 0.04 | 0.000 | *** | 0.09                    | 0.26                    |
| Proportion of Households under Poverty      | 0.63 | 0.23 | 0.007 | **  | 0.18                    | 1.09                    |
| No. of Household Members                    | 0.02 | 0.02 | 0.363 |     | -0.02                   | 0.05                    |
| Caregiver Smokes: Yes <sup>f</sup>          | 0.19 | 0.06 | 0.001 | **  | 0.07                    | 0.31                    |
| Epigenetic Assay: Batch 1 <sup>g</sup>      | 0.06 | 0.12 | 0.622 |     | -0.18                   | 0.31                    |
| Epigenetic Assay: Batch 2 <sup>g</sup>      | 0.14 | 0.12 | 0.248 |     | -0.10                   | 0.37                    |
| Time Since Loss                             | 0.00 | 0.00 | 0.235 |     | 0.00                    | 0.01                    |

Note: a = No Loss (reference) b = White (reference); c = Asian, Native American, Pacific Islander, Other (other race or multi-racial); d = College or Higher reference; e = Male (reference); f = No (reference); g = Batch 3 (reference)

\* $p \leq 0.05$ ; \*\* $p \leq 0.01$ ; \*\*\* $p \leq 0.001$

eTable 8. Parental Loss in Childhood and in Adulthood and Biological Aging (*n* = 3,921)

| Horvath                                      |       |      |       |                         |                         |
|----------------------------------------------|-------|------|-------|-------------------------|-------------------------|
|                                              | b     | se   | p     | 95% CI<br>(Lower Limit) | 95% CI<br>(Upper Limit) |
| Parental Loss in Childhood: Yes <sup>a</sup> | -0.21 | 0.17 | 0.224 | -0.54                   | 0.13                    |
| Parental Loss in Adulthood: Yes <sup>a</sup> | -0.02 | 0.06 | 0.762 | -0.14                   | 0.10                    |
| Age                                          | -0.02 | 0.01 | 0.142 | -0.04                   | 0.01                    |
| Race: Black <sup>b</sup>                     | -0.03 | 0.08 | 0.742 | -0.18                   | 0.13                    |
| Race: Hispanic <sup>b</sup>                  | -0.16 | 0.10 | 0.120 | -0.35                   | 0.04                    |
| Race: Other <sup>b,c</sup>                   | 0.06  | 0.10 | 0.583 | -0.15                   | 0.26                    |
| Parent Education: High School <sup>d</sup>   | 0.12  | 0.06 | 0.053 | 0.00                    | 0.24                    |
| Parent Education: Some College <sup>d</sup>  | 0.01  | 0.05 | 0.781 | -0.08                   | 0.11                    |
| Gender: Female <sup>e</sup>                  | -0.37 | 0.04 | 0.000 | ***                     | -0.45                   |
| Proportion of Households under Poverty       | 0.10  | 0.20 | 0.609 | -0.29                   | 0.50                    |
| No. of Household Members                     | 0.01  | 0.02 | 0.487 | -0.03                   | 0.05                    |
| Caregiver Smokes: Yes <sup>f</sup>           | -0.07 | 0.06 | 0.219 | -0.19                   | 0.04                    |
| Epigenetic Assay: Batch 1 <sup>g</sup>       | 0.33  | 0.24 | 0.169 | -0.14                   | 0.79                    |
| Epigenetic Assay: Batch 2 <sup>g</sup>       | 0.39  | 0.23 | 0.090 | -0.06                   | 0.85                    |
| Time Since Loss                              | 0.01  | 0.01 | 0.345 | -0.01                   | 0.02                    |
| PhenoAge                                     |       |      |       |                         |                         |
|                                              | b     | se   | p     | 95% CI<br>(Lower Limit) | 95% CI<br>(Upper Limit) |
| Parental Loss in Childhood: Yes <sup>a</sup> | -0.18 | 0.15 | 0.249 | -0.48                   | 0.12                    |
| Parental Loss in Adulthood: Yes <sup>a</sup> | 0.03  | 0.07 | 0.661 | -0.10                   | 0.16                    |
| Age                                          | -0.01 | 0.01 | 0.454 | -0.03                   | 0.02                    |
| Race: Black <sup>b</sup>                     | -0.20 | 0.07 | 0.006 | **                      | -0.34                   |
| Race: Hispanic <sup>b</sup>                  | -0.04 | 0.10 | 0.687 | -0.25                   | 0.16                    |
| Race: Other <sup>b,c</sup>                   | -0.05 | 0.13 | 0.705 | -0.32                   | 0.22                    |
| Parent Education: High School <sup>d</sup>   | 0.27  | 0.05 | 0.000 | ***                     | 0.16                    |
| Parent Education: Some College <sup>d</sup>  | 0.17  | 0.06 | 0.006 | **                      | 0.05                    |
| Gender: Female <sup>e</sup>                  | 0.10  | 0.04 | 0.011 | *                       | 0.02                    |
| Proportion of Households under Poverty       | 0.18  | 0.24 | 0.461 | -0.29                   | 0.64                    |
| No. of Household Members                     | -0.01 | 0.02 | 0.621 | -0.05                   | 0.03                    |
| Caregiver Smokes: Yes <sup>f</sup>           | 0.08  | 0.05 | 0.126 | -0.02                   | 0.18                    |
| Epigenetic Assay: Batch 1 <sup>g</sup>       | -0.15 | 0.15 | 0.333 | -0.45                   | 0.15                    |
| Epigenetic Assay: Batch 2 <sup>g</sup>       | -0.16 | 0.16 | 0.314 | -0.47                   | 0.15                    |
| Time Since Loss                              | 0.01  | 0.01 | 0.051 | 0.00                    | 0.02                    |
| GrimAge                                      |       |      |       |                         |                         |

|                                              | b     | se   | p     |     | 95% CI<br>(Lower Limit) | 95% CI<br>(Upper Limit) |
|----------------------------------------------|-------|------|-------|-----|-------------------------|-------------------------|
| Parental Loss in Childhood: Yes <sup>a</sup> | 0.03  | 0.13 | 0.809 |     | -0.22                   | 0.28                    |
| Parental Loss in Adulthood: Yes <sup>a</sup> | 0.15  | 0.06 | 0.011 | *   | 0.04                    | 0.27                    |
| Age                                          | -0.05 | 0.01 | 0.000 | *** | -0.08                   | -0.03                   |
| Race: Black <sup>b</sup>                     | 0.13  | 0.06 | 0.053 | .   | 0.00                    | 0.25                    |
| Race: Hispanic <sup>b</sup>                  | -0.41 | 0.09 | 0.000 | *** | -0.59                   | -0.23                   |
| Race: Other <sup>b,c</sup>                   | -0.06 | 0.10 | 0.513 |     | -0.25                   | 0.13                    |
| Parent Education: High School <sup>d</sup>   | 0.42  | 0.06 | 0.000 | *** | 0.30                    | 0.55                    |
| Parent Education: Some College <sup>d</sup>  | 0.29  | 0.05 | 0.000 | *** | 0.19                    | 0.40                    |
| Gender: Female <sup>e</sup>                  | -0.39 | 0.04 | 0.000 | *** | -0.47                   | -0.30                   |
| Proportion of Households under Poverty       | 0.47  | 0.25 | 0.062 |     | -0.02                   | 0.96                    |
| No. of Household Members                     | 0.02  | 0.02 | 0.255 |     | -0.02                   | 0.07                    |
| Caregiver Smokes: Yes <sup>f</sup>           | 0.44  | 0.06 | 0.000 | *** | 0.33                    | 0.55                    |
| Epigenetic Assay: Batch 1 <sup>g</sup>       | -0.17 | 0.28 | 0.536 |     | -0.72                   | 0.38                    |
| Epigenetic Assay: Batch 2 <sup>g</sup>       | 0.20  | 0.27 | 0.466 |     | -0.34                   | 0.74                    |
| Time Since Loss                              | 0.00  | 0.00 | 0.377 |     | -0.01                   | 0.01                    |

DunedinPACE

|                                              | b    | se   | p     |     | 95% CI<br>(Lower Limit) | 95% CI<br>(Upper Limit) |
|----------------------------------------------|------|------|-------|-----|-------------------------|-------------------------|
| Parental Loss in Childhood: Yes <sup>a</sup> | 0.00 | 0.14 | 0.989 |     | -0.27                   | 0.27                    |
| Parental Loss in Adulthood: Yes <sup>a</sup> | 0.15 | 0.06 | 0.025 | *   | 0.02                    | 0.28                    |
| Age                                          | 0.02 | 0.01 | 0.151 |     | -0.01                   | 0.04                    |
| Race: Black <sup>b</sup>                     | 0.36 | 0.06 | 0.000 | *** | 0.23                    | 0.48                    |
| Race: Hispanic <sup>b</sup>                  | 0.07 | 0.11 | 0.541 |     | -0.15                   | 0.29                    |
| Race: Other <sup>b,c</sup>                   | 0.25 | 0.12 | 0.032 | *   | 0.02                    | 0.49                    |
| Parent Education: High School <sup>d</sup>   | 0.52 | 0.06 | 0.000 | *** | 0.41                    | 0.63                    |
| Parent Education: Some College <sup>d</sup>  | 0.30 | 0.05 | 0.000 | *** | 0.19                    | 0.40                    |
| Gender: Female <sup>e</sup>                  | 0.17 | 0.04 | 0.000 | *** | 0.09                    | 0.26                    |
| Proportion of Households under Poverty       | 0.64 | 0.23 | 0.006 | **  | 0.18                    | 1.09                    |
| No. of Household Members                     | 0.02 | 0.02 | 0.356 |     | -0.02                   | 0.06                    |
| Caregiver Smokes: Yes <sup>f</sup>           | 0.19 | 0.06 | 0.001 | **  | 0.07                    | 0.30                    |
| Epigenetic Assay: Batch 1 <sup>g</sup>       | 0.06 | 0.12 | 0.656 |     | -0.19                   | 0.30                    |
| Epigenetic Assay: Batch 2 <sup>g</sup>       | 0.13 | 0.12 | 0.270 |     | -0.10                   | 0.37                    |
| Time Since Loss                              | 0.00 | 0.01 | 0.435 |     | -0.01                   | 0.01                    |

Note: a = No Loss (reference) b = White (reference); c = Asian, Native American, Pacific Islander, Other (other race or multi-racial); d = College or Higher reference; e = Male (reference); f = No (reference); g = Batch 3 (reference)

\* $p \leq 0.05$ ; \*\* $p \leq 0.01$ ; \*\*\* $p \leq 0.001$

eTable 9. Number of Losses and Biological Aging (*n* = 3,963)

| Horvath                                     |       |      |       |                         |                         |       |
|---------------------------------------------|-------|------|-------|-------------------------|-------------------------|-------|
|                                             | b     | se   | p     | 95% CI<br>(Lower Limit) | 95% CI<br>(Upper Limit) |       |
| One Loss: Yes <sup>a</sup>                  | -0.01 | 0.05 | 0.863 | -0.10                   | 0.08                    |       |
| Two or More Losses: Yes <sup>a</sup>        | -0.08 | 0.07 | 0.252 | -0.23                   | 0.06                    |       |
| Age                                         | -0.01 | 0.01 | 0.216 | -0.04                   | 0.01                    |       |
| Race: Black <sup>b</sup>                    | -0.02 | 0.08 | 0.753 | -0.18                   | 0.13                    |       |
| Race: Hispanic <sup>b</sup>                 | -0.16 | 0.10 | 0.098 | -0.36                   | 0.03                    |       |
| Race: Other <sup>b, c</sup>                 | 0.09  | 0.09 | 0.274 | -0.07                   | 0.26                    |       |
| Parent Education: High School <sup>d</sup>  | 0.12  | 0.06 | 0.044 | *                       | 0.00                    | 0.25  |
| Parent Education: Some College <sup>d</sup> | 0.03  | 0.05 | 0.597 | -0.07                   | 0.12                    |       |
| Gender: Female <sup>e</sup>                 | -0.37 | 0.04 | 0.000 | ***                     | -0.45                   | -0.28 |
| Proportion of Households under Poverty      | 0.11  | 0.20 | 0.588 | -0.28                   | 0.50                    |       |
| No. of Household Members                    | 0.02  | 0.02 | 0.435 | -0.02                   | 0.06                    |       |
| Caregiver Smokes: Yes <sup>f</sup>          | -0.07 | 0.06 | 0.223 | -0.19                   | 0.04                    |       |
| Epigenetic Assay: Batch 1 <sup>g</sup>      | 0.34  | 0.23 | 0.147 | -0.12                   | 0.80                    |       |
| Epigenetic Assay: Batch 2 <sup>g</sup>      | 0.41  | 0.23 | 0.078 | -0.05                   | 0.86                    |       |
| PhenoAge                                    |       |      |       |                         |                         |       |
|                                             | b     | se   | p     | 95% CI<br>(Lower Limit) | 95% CI<br>(Upper Limit) |       |
| One Loss: Yes <sup>a</sup>                  | 0.09  | 0.05 | 0.099 | -0.02                   | 0.19                    |       |
| Two or More Losses: Yes <sup>a</sup>        | 0.15  | 0.07 | 0.028 | *                       | 0.02                    | 0.28  |
| Age                                         | -0.01 | 0.01 | 0.493 | -0.03                   | 0.02                    |       |
| Race: Black <sup>b</sup>                    | -0.19 | 0.07 | 0.010 | *                       | -0.33                   | -0.05 |
| Race: Hispanic <sup>b</sup>                 | -0.05 | 0.10 | 0.637 | -0.24                   | 0.15                    |       |
| Race: Other <sup>b, c</sup>                 | -0.01 | 0.13 | 0.957 | -0.27                   | 0.25                    |       |
| Parent Education: High School <sup>d</sup>  | 0.26  | 0.05 | 0.000 | ***                     | 0.16                    | 0.37  |
| Parent Education: Some College <sup>d</sup> | 0.16  | 0.06 | 0.009 | **                      | 0.04                    | 0.28  |
| Gender: Female <sup>e</sup>                 | 0.10  | 0.04 | 0.011 | *                       | 0.02                    | 0.18  |
| Proportion of Households under Poverty      | 0.14  | 0.24 | 0.562 | -0.33                   | 0.60                    |       |
| No. of Household Members                    | -0.01 | 0.02 | 0.565 | -0.06                   | 0.03                    |       |
| Caregiver Smokes: Yes <sup>f</sup>          | 0.08  | 0.05 | 0.114 | -0.02                   | 0.18                    |       |
| Epigenetic Assay: Batch 1 <sup>g</sup>      | -0.14 | 0.15 | 0.345 | -0.44                   | 0.16                    |       |
| Epigenetic Assay: Batch 2 <sup>g</sup>      | -0.15 | 0.16 | 0.334 | -0.46                   | 0.16                    |       |
| GrimAge                                     |       |      |       |                         |                         |       |
|                                             | b     | se   | p     | 95% CI<br>(Lower Limit) | 95% CI<br>(Upper Limit) |       |

|                                             |       |      |       |     |       |       |
|---------------------------------------------|-------|------|-------|-----|-------|-------|
| One Loss: Yes <sup>a</sup>                  | 0.19  | 0.05 | 0.000 | *** | 0.09  | 0.29  |
| Two or More Losses: Yes <sup>a</sup>        | 0.27  | 0.09 | 0.003 | **  | 0.09  | 0.45  |
| Age                                         | -0.05 | 0.01 | 0.000 | *** | -0.07 | -0.03 |
| Race: Black <sup>b</sup>                    | 0.12  | 0.07 | 0.080 |     | -0.01 | 0.24  |
| Race: Hispanic <sup>b</sup>                 | -0.42 | 0.09 | 0.000 | *** | -0.59 | -0.24 |
| Race: Other <sup>b, c</sup>                 | -0.02 | 0.10 | 0.840 |     | -0.23 | 0.18  |
| Parent Education: High School <sup>d</sup>  | 0.41  | 0.06 | 0.000 | *** | 0.29  | 0.53  |
| Parent Education: Some College <sup>d</sup> | 0.29  | 0.05 | 0.000 | *** | 0.18  | 0.39  |
| Gender: Female <sup>e</sup>                 | -0.40 | 0.04 | 0.000 | *** | -0.48 | -0.31 |
| Proportion of Households under Poverty      | 0.47  | 0.24 | 0.056 |     | -0.01 | 0.95  |
| No. of Household Members                    | 0.02  | 0.02 | 0.336 |     | -0.02 | 0.06  |
| Caregiver Smokes: Yes <sup>f</sup>          | 0.46  | 0.06 | 0.000 | *** | 0.34  | 0.57  |
| Epigenetic Assay: Batch 1 <sup>g</sup>      | -0.15 | 0.29 | 0.597 |     | -0.72 | 0.41  |
| Epigenetic Assay: Batch 2 <sup>g</sup>      | 0.21  | 0.28 | 0.446 |     | -0.34 | 0.76  |

DunedinPACE

|                                             | b    | se   | p     |     | 95% CI<br>(Lower Limit) | 95% CI<br>(Upper Limit) |
|---------------------------------------------|------|------|-------|-----|-------------------------|-------------------------|
| One Loss: Yes <sup>a</sup>                  | 0.17 | 0.05 | 0.000 | *** | 0.08                    | 0.27                    |
| Two or More Losses: Yes <sup>a</sup>        | 0.22 | 0.06 | 0.000 | *** | 0.10                    | 0.34                    |
| Age                                         | 0.02 | 0.01 | 0.126 |     | 0.00                    | 0.04                    |
| Race: Black <sup>b</sup>                    | 0.35 | 0.07 | 0.000 | *** | 0.22                    | 0.47                    |
| Race: Hispanic <sup>b</sup>                 | 0.06 | 0.10 | 0.540 |     | -0.14                   | 0.27                    |
| Race: Other <sup>b, c</sup>                 | 0.28 | 0.11 | 0.016 | *   | 0.05                    | 0.50                    |
| Parent Education: High School <sup>d</sup>  | 0.50 | 0.05 | 0.000 | *** | 0.39                    | 0.61                    |
| Parent Education: Some College <sup>d</sup> | 0.29 | 0.05 | 0.000 | *** | 0.19                    | 0.40                    |
| Gender: Female <sup>e</sup>                 | 0.17 | 0.04 | 0.000 | *** | 0.09                    | 0.25                    |
| Proportion of Households under Poverty      | 0.64 | 0.23 | 0.006 | **  | 0.18                    | 1.09                    |
| No. of Household Members                    | 0.02 | 0.02 | 0.378 |     | -0.02                   | 0.05                    |
| Caregiver Smokes: Yes <sup>f</sup>          | 0.19 | 0.06 | 0.001 | **  | 0.08                    | 0.31                    |
| Epigenetic Assay: Batch 1 <sup>g</sup>      | 0.07 | 0.12 | 0.588 |     | -0.18                   | 0.31                    |
| Epigenetic Assay: Batch 2 <sup>g</sup>      | 0.14 | 0.12 | 0.234 |     | -0.09                   | 0.38                    |

Note: a = No Loss (reference) b = White (reference); c = Asian, Native American, Pacific Islander, Other (other race or multi-racial); d = College or Higher reference; e = Male (reference); f = No (reference); g = Batch 3 (reference)

\* $p \leq 0.05$ ; \*\* $p \leq 0.01$ ; \*\*\* $p \leq 0.001$



eTable 10. Parental Loss at Any Time Period (Childhood to Adulthood) and Biological Aging ( $n = 3,963$ )

| Horvath                                     |       |      |       |     |                         |                         |
|---------------------------------------------|-------|------|-------|-----|-------------------------|-------------------------|
|                                             | b     | se   | p     |     | 95% CI<br>(Lower Limit) | 95% CI<br>(Upper Limit) |
| Parental Loss: Yes <sup>a</sup>             | 0.00  | 0.05 | 0.982 |     | -0.09                   | 0.09                    |
| Age                                         | -0.02 | 0.01 | 0.177 |     | -0.04                   | 0.01                    |
| Race: Black <sup>b</sup>                    | -0.03 | 0.08 | 0.684 |     | -0.18                   | 0.12                    |
| Race: Hispanic <sup>b</sup>                 | -0.16 | 0.10 | 0.108 |     | -0.35                   | 0.04                    |
| Race: Other <sup>b,c</sup>                  | 0.09  | 0.08 | 0.271 |     | -0.07                   | 0.26                    |
| Parent Education: High School <sup>d</sup>  | 0.12  | 0.06 | 0.055 |     | 0.00                    | 0.24                    |
| Parent Education: Some College <sup>d</sup> | 0.02  | 0.05 | 0.637 |     | -0.07                   | 0.12                    |
| Gender: Female <sup>e</sup>                 | -0.37 | 0.04 | 0.000 | *** | -0.45                   | -0.28                   |
| Proportion of Households under Poverty      | 0.09  | 0.20 | 0.647 |     | -0.30                   | 0.48                    |
| No. of Household Members                    | 0.02  | 0.02 | 0.427 |     | -0.02                   | 0.06                    |
| Caregiver Smokes: Yes <sup>f</sup>          | -0.08 | 0.06 | 0.198 |     | -0.19                   | 0.04                    |
| Epigenetic Assay: Batch 1 <sup>g</sup>      | 0.33  | 0.23 | 0.156 |     | -0.13                   | 0.80                    |
| Epigenetic Assay: Batch 2 <sup>g</sup>      | 0.40  | 0.23 | 0.083 |     | -0.05                   | 0.86                    |
| PhenoAge                                    |       |      |       |     |                         |                         |
|                                             | b     | se   | p     |     | 95% CI<br>(Lower Limit) | 95% CI<br>(Upper Limit) |
| Parental Loss: Yes <sup>a</sup>             | 0.12  | 0.05 | 0.014 | *   | 0.02                    | 0.21                    |
| Age                                         | -0.01 | 0.01 | 0.505 |     | -0.03                   | 0.02                    |
| Race: Black <sup>b</sup>                    | -0.19 | 0.07 | 0.011 | *   | -0.33                   | -0.04                   |
| Race: Hispanic <sup>b</sup>                 | -0.05 | 0.10 | 0.630 |     | -0.25                   | 0.15                    |
| Race: Other <sup>b,c</sup>                  | -0.01 | 0.13 | 0.944 |     | -0.27                   | 0.25                    |
| Parent Education: High School <sup>3</sup>  | 0.27  | 0.05 | 0.000 | *** | 0.16                    | 0.38                    |
| Parent Education: Some College <sup>3</sup> | 0.16  | 0.06 | 0.008 | **  | 0.04                    | 0.28                    |
| Gender: Female <sup>4</sup>                 | 0.10  | 0.04 | 0.011 | *   | 0.02                    | 0.18                    |
| Proportion of Households under Poverty      | 0.14  | 0.24 | 0.546 |     | -0.33                   | 0.61                    |
| No. of Household Members                    | -0.01 | 0.02 | 0.625 |     | -0.05                   | 0.03                    |
| Caregiver Smokes: Yes <sup>f</sup>          | 0.08  | 0.05 | 0.118 |     | -0.02                   | 0.19                    |
| Epigenetic Assay: Batch 1 <sup>g</sup>      | -0.15 | 0.15 | 0.328 |     | -0.45                   | 0.15                    |
| Epigenetic Assay: Batch 2 <sup>g</sup>      | -0.16 | 0.16 | 0.312 |     | -0.47                   | 0.15                    |
| GrimAge                                     |       |      |       |     |                         |                         |
|                                             | b     | se   | p     |     | 95% CI<br>(Lower Limit) | 95% CI<br>(Upper Limit) |
| Parental Loss: Yes <sup>a</sup>             | 0.21  | 0.05 | 0.000 | *** | 0.12                    | 0.31                    |

|                                             |       |      |       |     |       |       |
|---------------------------------------------|-------|------|-------|-----|-------|-------|
| Age                                         | -0.05 | 0.01 | 0.000 | *** | -0.07 | -0.03 |
| Race: Black <sup>b</sup>                    | 0.12  | 0.06 | 0.061 |     | -0.01 | 0.25  |
| Race: Hispanic <sup>b</sup>                 | -0.42 | 0.09 | 0.000 | *** | -0.60 | -0.24 |
| Race: Other <sup>b,c</sup>                  | -0.02 | 0.10 | 0.836 |     | -0.23 | 0.18  |
| Parent Education: High School <sup>d</sup>  | 0.42  | 0.06 | 0.000 | *** | 0.30  | 0.54  |
| Parent Education: Some College <sup>d</sup> | 0.29  | 0.05 | 0.000 | *** | 0.19  | 0.40  |
| Gender: Female <sup>e</sup>                 | -0.40 | 0.04 | 0.000 | *** | -0.48 | -0.31 |
| Proportion of Households under Poverty      | 0.48  | 0.25 | 0.053 |     | -0.01 | 0.97  |
| No. of Household Members                    | 0.02  | 0.02 | 0.278 |     | -0.02 | 0.07  |
| Caregiver Smokes: Yes <sup>f</sup>          | 0.46  | 0.06 | 0.000 | *** | 0.34  | 0.57  |
| Epigenetic Assay: Batch 1 <sup>g</sup>      | -0.16 | 0.28 | 0.573 |     | -0.72 | 0.40  |
| Epigenetic Assay: Batch 2 <sup>g</sup>      | 0.20  | 0.28 | 0.466 |     | -0.35 | 0.75  |

DunedinPACE

|                                             | b    | se   | p     |     | 95% CI<br>(Lower Limit) | 95% CI<br>(Upper Limit) |
|---------------------------------------------|------|------|-------|-----|-------------------------|-------------------------|
| Parental Loss: Yes <sup>a</sup>             | 0.19 | 0.04 | 0.000 | *** | 0.11                    | 0.28                    |
| Age                                         | 0.02 | 0.01 | 0.117 |     | 0.00                    | 0.04                    |
| Race: Black <sup>b</sup>                    | 0.35 | 0.07 | 0.000 | *** | 0.22                    | 0.48                    |
| Race: Hispanic <sup>b</sup>                 | 0.07 | 0.11 | 0.548 |     | -0.15                   | 0.28                    |
| Race: Other <sup>b,c</sup>                  | 0.27 | 0.11 | 0.017 | *   | 0.05                    | 0.50                    |
| Parent Education: High School <sup>d</sup>  | 0.51 | 0.06 | 0.000 | *** | 0.40                    | 0.62                    |
| Parent Education: Some College <sup>d</sup> | 0.29 | 0.05 | 0.000 | *** | 0.19                    | 0.40                    |
| Gender: Female <sup>e</sup>                 | 0.17 | 0.04 | 0.000 | *** | 0.09                    | 0.25                    |
| Proportion of Households under Poverty      | 0.64 | 0.23 | 0.006 | **  | 0.19                    | 1.10                    |
| No. of Household Members                    | 0.02 | 0.02 | 0.313 |     | -0.02                   | 0.06                    |
| Caregiver Smokes: Yes <sup>f</sup>          | 0.19 | 0.06 | 0.001 | **  | 0.08                    | 0.31                    |
| Epigenetic Assay: Batch 1 <sup>g</sup>      | 0.06 | 0.12 | 0.647 |     | -0.19                   | 0.30                    |
| Epigenetic Assay: Batch 2 <sup>g</sup>      | 0.13 | 0.12 | 0.273 |     | -0.10                   | 0.37                    |

Note: a = No Loss (reference) b = White (reference); c = Asian, Native American, Pacific Islander, Other (other race or multi-racial); d = College or Higher reference; e = Male (reference); f = No (reference); g = Batch 3 (reference)

\* $p \leq 0.05$ ; \*\* $p \leq 0.01$ ; \*\*\* $p \leq 0.001$

eTable 11. Any Loss in Childhood and in Adulthood and Biological Aging ( $n = 3,963$ )

| Horvath                                     |       |      |       |     |                         |                         |
|---------------------------------------------|-------|------|-------|-----|-------------------------|-------------------------|
|                                             | b     | se   | p     |     | 95% CI<br>(Lower Limit) | 95% CI<br>(Upper Limit) |
| Any Loss in Childhood: Yes <sup>a</sup>     | -0.07 | 0.08 | 0.371 |     | -0.22                   | 0.08                    |
| Any Loss in Adulthood: Yes <sup>a</sup>     | -0.01 | 0.05 | 0.883 |     | -0.10                   | 0.09                    |
| Age                                         | -0.02 | 0.01 | 0.178 |     | -0.04                   | 0.01                    |
| Race: Black <sup>b</sup>                    | -0.03 | 0.08 | 0.730 |     | -0.18                   | 0.13                    |
| Race: Hispanic <sup>b</sup>                 | -0.16 | 0.10 | 0.107 |     | -0.35                   | 0.03                    |
| Race: Other <sup>b,c</sup>                  | 0.10  | 0.09 | 0.266 |     | -0.07                   | 0.26                    |
| Parent Education: High School <sup>d</sup>  | 0.12  | 0.06 | 0.049 | *   | 0.00                    | 0.25                    |
| Parent Education: Some College <sup>d</sup> | 0.02  | 0.05 | 0.645 |     | -0.07                   | 0.12                    |
| Gender: Female <sup>e</sup>                 | -0.36 | 0.04 | 0.000 | *** | -0.45                   | -0.28                   |
| Proportion of Households under Poverty      | 0.10  | 0.19 | 0.616 |     | -0.29                   | 0.48                    |
| No. of Household Members                    | 0.02  | 0.02 | 0.445 |     | -0.02                   | 0.06                    |
| Caregiver Smokes: Yes <sup>f</sup>          | -0.07 | 0.06 | 0.215 |     | -0.19                   | 0.04                    |
| Epigenetic Assay: Batch 1 <sup>g</sup>      | 0.34  | 0.23 | 0.155 |     | -0.13                   | 0.80                    |
| Epigenetic Assay: Batch 2 <sup>g</sup>      | 0.40  | 0.23 | 0.083 |     | -0.05                   | 0.86                    |
| PhenoAge                                    |       |      |       |     |                         |                         |
|                                             | b     | se   | p     |     | 95% CI<br>(Lower Limit) | 95% CI<br>(Upper Limit) |
| Any Loss in Childhood: Yes <sup>a</sup>     | 0.07  | 0.08 | 0.398 |     | -0.09                   | 0.23                    |
| Any Loss in Adulthood: Yes <sup>a</sup>     | 0.08  | 0.05 | 0.081 |     | -0.01                   | 0.18                    |
| Age                                         | -0.01 | 0.01 | 0.535 |     | -0.03                   | 0.02                    |
| Race: Black <sup>b</sup>                    | -0.18 | 0.07 | 0.013 | *   | -0.32                   | -0.04                   |
| Race: Hispanic <sup>b</sup>                 | -0.05 | 0.10 | 0.647 |     | -0.25                   | 0.16                    |
| Race: Other <sup>b,c</sup>                  | 0.00  | 0.13 | 0.979 |     | -0.27                   | 0.26                    |
| Parent Education: High School <sup>d</sup>  | 0.27  | 0.05 | 0.000 | *** | 0.16                    | 0.38                    |
| Parent Education: Some College <sup>d</sup> | 0.16  | 0.06 | 0.008 | **  | 0.04                    | 0.28                    |
| Gender: Female <sup>e</sup>                 | 0.10  | 0.04 | 0.012 | *   | 0.02                    | 0.18                    |
| Proportion of Households under Poverty      | 0.14  | 0.24 | 0.549 |     | -0.33                   | 0.61                    |
| No. of Household Members                    | -0.01 | 0.02 | 0.582 |     | -0.05                   | 0.03                    |
| Caregiver Smokes: Yes <sup>f</sup>          | 0.08  | 0.05 | 0.109 |     | -0.02                   | 0.19                    |
| Epigenetic Assay: Batch 1 <sup>g</sup>      | -0.14 | 0.15 | 0.363 |     | -0.44                   | 0.16                    |
| Epigenetic Assay: Batch 2 <sup>g</sup>      | -0.15 | 0.16 | 0.344 |     | -0.46                   | 0.16                    |
| GrimAge                                     |       |      |       |     |                         |                         |
|                                             | b     | se   | p     |     | 95% CI<br>(Lower Limit) | 95% CI<br>(Upper Limit) |

|                                             |       |      |       |     |       |       |
|---------------------------------------------|-------|------|-------|-----|-------|-------|
| Any Loss in Childhood: Yes <sup>a</sup>     | 0.11  | 0.09 | 0.207 |     | -0.06 | 0.28  |
| Any Loss in Adulthood: Yes <sup>a</sup>     | 0.16  | 0.05 | 0.001 | **  | 0.07  | 0.26  |
| Age                                         | -0.05 | 0.01 | 0.000 | *** | -0.07 | -0.03 |
| Race: Black <sup>b</sup>                    | 0.13  | 0.07 | 0.048 | *   | 0.00  | 0.26  |
| Race: Hispanic <sup>b</sup>                 | -0.41 | 0.09 | 0.000 | *** | -0.59 | -0.24 |
| Race: Other <sup>b,c</sup>                  | -0.01 | 0.11 | 0.920 |     | -0.22 | 0.20  |
| Parent Education: High School <sup>d</sup>  | 0.42  | 0.06 | 0.000 | *** | 0.30  | 0.54  |
| Parent Education: Some College <sup>d</sup> | 0.29  | 0.05 | 0.000 | *** | 0.19  | 0.40  |
| Gender: Female <sup>e</sup>                 | -0.40 | 0.04 | 0.000 | *** | -0.48 | -0.32 |
| Proportion of Households under Poverty      | 0.48  | 0.24 | 0.053 |     | -0.01 | 0.96  |
| No. of Household Members                    | 0.02  | 0.02 | 0.324 |     | -0.02 | 0.06  |
| Caregiver Smokes: Yes <sup>f</sup>          | 0.46  | 0.06 | 0.000 | *** | 0.34  | 0.58  |
| Epigenetic Assay: Batch 1 <sup>g</sup>      | -0.14 | 0.29 | 0.622 |     | -0.71 | 0.43  |
| Epigenetic Assay: Batch 2 <sup>g</sup>      | 0.22  | 0.28 | 0.433 |     | -0.33 | 0.77  |

DunedinPACE

|                                             | b    | se   | p     |     | 95% CI<br>(Lower Limit) | 95% CI<br>(Upper Limit) |
|---------------------------------------------|------|------|-------|-----|-------------------------|-------------------------|
| Any Loss in Childhood: Yes <sup>a</sup>     | 0.08 | 0.08 | 0.344 |     | -0.08                   | 0.24                    |
| Any Loss in Adulthood: Yes <sup>a</sup>     | 0.15 | 0.05 | 0.002 | **  | 0.06                    | 0.24                    |
| Age                                         | 0.02 | 0.01 | 0.108 |     | 0.00                    | 0.04                    |
| Race: Black <sup>b</sup>                    | 0.36 | 0.06 | 0.000 | *** | 0.23                    | 0.49                    |
| Race: Hispanic <sup>b</sup>                 | 0.07 | 0.11 | 0.516 |     | -0.14                   | 0.28                    |
| Race: Other <sup>b,c</sup>                  | 0.29 | 0.12 | 0.015 | *   | 0.06                    | 0.51                    |
| Parent Education: High School <sup>d</sup>  | 0.51 | 0.05 | 0.000 | *** | 0.41                    | 0.62                    |
| Parent Education: Some College <sup>d</sup> | 0.30 | 0.05 | 0.000 | *** | 0.19                    | 0.40                    |
| Gender: Female <sup>e</sup>                 | 0.17 | 0.04 | 0.000 | *** | 0.09                    | 0.25                    |
| Proportion of Households under Poverty      | 0.64 | 0.23 | 0.006 | **  | 0.19                    | 1.10                    |
| No. of Household Members                    | 0.02 | 0.02 | 0.373 |     | -0.02                   | 0.05                    |
| Caregiver Smokes: Yes <sup>f</sup>          | 0.20 | 0.06 | 0.001 | *** | 0.08                    | 0.31                    |
| Epigenetic Assay: Batch 1 <sup>g</sup>      | 0.07 | 0.13 | 0.555 |     | -0.17                   | 0.32                    |
| Epigenetic Assay: Batch 2 <sup>g</sup>      | 0.15 | 0.12 | 0.220 |     | -0.09                   | 0.38                    |

Note: a = No Loss (reference) b = White (reference); c = Asian, Native American, Pacific Islander, Other (other race or multi-racial); d = College or Higher reference; e = Male (reference); f = No (reference); g = Batch 3 (reference)

\* $p \leq 0.05$ ; \*\* $p \leq 0.01$ ; \*\*\* $p \leq 0.001$

eTable 12. Parental Loss in Childhood and in Adulthood and Biological Aging (*n* = 3,963)

| Horvath                                      |       |      |       |     |                         |                         |
|----------------------------------------------|-------|------|-------|-----|-------------------------|-------------------------|
|                                              | b     | se   | p     |     | 95% CI<br>(Lower Limit) | 95% CI<br>(Upper Limit) |
| Parental Loss in Childhood: Yes <sup>a</sup> | -0.07 | 0.08 | 0.357 |     | -0.23                   | 0.09                    |
| Parental Loss in Adulthood: Yes <sup>a</sup> | 0.02  | 0.05 | 0.627 |     | -0.07                   | 0.12                    |
| Age                                          | -0.02 | 0.01 | 0.160 |     | -0.04                   | 0.01                    |
| Race: Black <sup>b</sup>                     | -0.03 | 0.08 | 0.691 |     | -0.18                   | 0.12                    |
| Race: Hispanic <sup>b</sup>                  | -0.16 | 0.10 | 0.110 |     | -0.35                   | 0.04                    |
| Race: Other <sup>b,c</sup>                   | 0.09  | 0.08 | 0.265 |     | -0.07                   | 0.26                    |
| Parent Education: High School <sup>d</sup>   | 0.12  | 0.06 | 0.052 |     | 0.00                    | 0.24                    |
| Parent Education: Some College <sup>d</sup>  | 0.02  | 0.05 | 0.664 |     | -0.08                   | 0.12                    |
| Gender: Female <sup>e</sup>                  | -0.36 | 0.04 | 0.000 | *** | -0.45                   | -0.28                   |
| Proportion of Households under Poverty       | 0.09  | 0.20 | 0.658 |     | -0.30                   | 0.47                    |
| No. of Household Members                     | 0.02  | 0.02 | 0.432 |     | -0.02                   | 0.06                    |
| Caregiver Smokes: Yes <sup>f</sup>           | -0.08 | 0.06 | 0.192 |     | -0.19                   | 0.04                    |
| Epigenetic Assay: Batch 1 <sup>g</sup>       | 0.33  | 0.23 | 0.158 |     | -0.13                   | 0.79                    |
| Epigenetic Assay: Batch 2 <sup>g</sup>       | 0.40  | 0.23 | 0.085 |     | -0.06                   | 0.85                    |
| PhenoAge                                     |       |      |       |     |                         |                         |
|                                              | b     | se   | p     |     | 95% CI<br>(Lower Limit) | 95% CI<br>(Upper Limit) |
| Parental Loss in Childhood: Yes <sup>a</sup> | 0.07  | 0.08 | 0.393 |     | -0.09                   | 0.24                    |
| Parental Loss in Adulthood: Yes <sup>a</sup> | 0.10  | 0.05 | 0.035 | *   | 0.01                    | 0.20                    |
| Age                                          | -0.01 | 0.01 | 0.516 |     | -0.03                   | 0.02                    |
| Race: Black <sup>b</sup>                     | -0.18 | 0.07 | 0.013 | *   | -0.32                   | -0.04                   |
| Race: Hispanic <sup>b</sup>                  | -0.05 | 0.10 | 0.639 |     | -0.25                   | 0.15                    |
| Race: Other <sup>b,c</sup>                   | -0.01 | 0.13 | 0.969 |     | -0.27                   | 0.26                    |
| Parent Education: High School <sup>d</sup>   | 0.27  | 0.05 | 0.000 | *** | 0.16                    | 0.38                    |
| Parent Education: Some College <sup>d</sup>  | 0.16  | 0.06 | 0.008 | **  | 0.04                    | 0.28                    |
| Gender: Female <sup>e</sup>                  | 0.10  | 0.04 | 0.011 | *   | 0.02                    | 0.18                    |
| Proportion of Households under Poverty       | 0.15  | 0.24 | 0.536 |     | -0.32                   | 0.62                    |
| No. of Household Members                     | -0.01 | 0.02 | 0.610 |     | -0.05                   | 0.03                    |
| Caregiver Smokes: Yes <sup>f</sup>           | 0.08  | 0.05 | 0.115 |     | -0.02                   | 0.19                    |
| Epigenetic Assay: Batch 1 <sup>g</sup>       | -0.15 | 0.15 | 0.339 |     | -0.45                   | 0.16                    |
| Epigenetic Assay: Batch 2 <sup>g</sup>       | -0.16 | 0.16 | 0.321 |     | -0.46                   | 0.15                    |
| GrimAge                                      |       |      |       |     |                         |                         |
|                                              | b     | se   | p     |     | 95% CI<br>(Lower Limit) | 95% CI<br>(Upper Limit) |

|                                              |       |      |       |     |       |       |
|----------------------------------------------|-------|------|-------|-----|-------|-------|
| Parental Loss in Childhood: Yes <sup>a</sup> | 0.11  | 0.10 | 0.260 |     | -0.08 | 0.31  |
| Parental Loss in Adulthood: Yes <sup>a</sup> | 0.17  | 0.05 | 0.001 | **  | 0.07  | 0.27  |
| Age                                          | -0.05 | 0.01 | 0.000 | *** | -0.07 | -0.03 |
| Race: Black <sup>b</sup>                     | 0.13  | 0.07 | 0.045 | *   | 0.00  | 0.26  |
| Race: Hispanic <sup>b</sup>                  | -0.41 | 0.09 | 0.000 | *** | -0.59 | -0.24 |
| Race: Other <sup>b,c</sup>                   | -0.01 | 0.11 | 0.906 |     | -0.22 | 0.20  |
| Parent Education: High School <sup>d</sup>   | 0.42  | 0.06 | 0.000 | *** | 0.30  | 0.54  |
| Parent Education: Some College <sup>d</sup>  | 0.30  | 0.05 | 0.000 | *** | 0.19  | 0.40  |
| Gender: Female <sup>e</sup>                  | -0.40 | 0.04 | 0.000 | *** | -0.48 | -0.31 |
| Proportion of Households under Poverty       | 0.49  | 0.25 | 0.048 | *   | 0.00  | 0.98  |
| No. of Household Members                     | 0.02  | 0.02 | 0.311 |     | -0.02 | 0.06  |
| Caregiver Smokes: Yes <sup>f</sup>           | 0.46  | 0.06 | 0.000 | *** | 0.35  | 0.58  |
| Epigenetic Assay: Batch 1 <sup>g</sup>       | -0.15 | 0.29 | 0.603 |     | -0.72 | 0.42  |
| Epigenetic Assay: Batch 2 <sup>g</sup>       | 0.21  | 0.28 | 0.445 |     | -0.34 | 0.76  |

DunedinPACE

|                                              | b    | se   | p     |     | 95% CI<br>(Lower Limit) | 95% CI<br>(Upper Limit) |
|----------------------------------------------|------|------|-------|-----|-------------------------|-------------------------|
| Parental Loss in Childhood: Yes <sup>a</sup> | 0.09 | 0.09 | 0.337 |     | -0.09                   | 0.26                    |
| Parental Loss in Adulthood: Yes <sup>a</sup> | 0.17 | 0.05 | 0.000 | *** | 0.08                    | 0.26                    |
| Age                                          | 0.02 | 0.01 | 0.111 |     | 0.00                    | 0.04                    |
| Race: Black <sup>b</sup>                     | 0.36 | 0.06 | 0.000 | *** | 0.23                    | 0.49                    |
| Race: Hispanic <sup>b</sup>                  | 0.07 | 0.11 | 0.531 |     | -0.15                   | 0.28                    |
| Race: Other <sup>b,c</sup>                   | 0.28 | 0.11 | 0.015 | *   | 0.06                    | 0.51                    |
| Parent Education: High School <sup>d</sup>   | 0.51 | 0.06 | 0.000 | *** | 0.40                    | 0.62                    |
| Parent Education: Some College <sup>d</sup>  | 0.30 | 0.05 | 0.000 | *** | 0.19                    | 0.40                    |
| Gender: Female <sup>e</sup>                  | 0.17 | 0.04 | 0.000 | *** | 0.09                    | 0.25                    |
| Proportion of Households under Poverty       | 0.65 | 0.23 | 0.005 | **  | 0.20                    | 1.10                    |
| No. of Household Members                     | 0.02 | 0.02 | 0.348 |     | -0.02                   | 0.05                    |
| Caregiver Smokes: Yes <sup>f</sup>           | 0.20 | 0.06 | 0.001 | *** | 0.08                    | 0.31                    |
| Epigenetic Assay: Batch 1 <sup>g</sup>       | 0.07 | 0.12 | 0.600 |     | -0.18                   | 0.31                    |
| Epigenetic Assay: Batch 2 <sup>g</sup>       | 0.14 | 0.12 | 0.246 |     | -0.10                   | 0.37                    |

Note: a = No Loss (reference) b = White (reference); c = Asian, Native American, Pacific Islander, Other (other race or multi-racial); d = College or Higher reference; e = Male (reference); f = No (reference); g = Batch 3 (reference)

\* $p \leq 0.05$ ; \*\* $p \leq 0.01$ ; \*\*\* $p \leq 0.001$

eTable 13. Number of Losses and Biological Aging ( $n = 3,362$ )

| Horvath                                     |       |      |       |                         |                         |       |
|---------------------------------------------|-------|------|-------|-------------------------|-------------------------|-------|
|                                             | b     | se   | p     | 95% CI<br>(Lower Limit) | 95% CI<br>(Upper Limit) |       |
| One Loss: Yes <sup>a</sup>                  | -0.03 | 0.05 | 0.593 | -0.13                   | 0.08                    |       |
| Two or More Losses: Yes <sup>a</sup>        | -0.07 | 0.10 | 0.478 | -0.27                   | 0.13                    |       |
| Age                                         | -0.01 | 0.01 | 0.291 | -0.04                   | 0.01                    |       |
| Race: Black <sup>b</sup>                    | -0.03 | 0.10 | 0.775 | -0.22                   | 0.17                    |       |
| Parent Education: High School <sup>c</sup>  | 0.10  | 0.07 | 0.135 | -0.03                   | 0.23                    |       |
| Parent Education: Some College <sup>c</sup> | -0.02 | 0.05 | 0.761 | -0.11                   | 0.08                    |       |
| Gender: Female <sup>d</sup>                 | -0.36 | 0.05 | 0.000 | ***                     | -0.45                   | -0.27 |
| Proportion of Households under<br>Poverty   | 0.26  | 0.20 | 0.182 | -0.13                   | 0.65                    |       |
| No. of Household Members                    | 0.03  | 0.02 | 0.149 | -0.01                   | 0.07                    |       |
| Caregiver Smokes: Yes <sup>e</sup>          | -0.10 | 0.06 | 0.076 | -0.21                   | 0.01                    |       |
| Epigenetic Assay: Batch 1 <sup>f</sup>      | 0.32  | 0.28 | 0.247 | -0.23                   | 0.87                    |       |
| Epigenetic Assay: Batch 2 <sup>f</sup>      | 0.38  | 0.27 | 0.168 | -0.16                   | 0.92                    |       |
| One Loss* Race                              | 0.00  | 0.14 | 0.993 | -0.27                   | 0.27                    |       |
| Two or More Losses*Race                     | -0.09 | 0.18 | 0.630 | -0.43                   | 0.26                    |       |
| PhenoAge                                    |       |      |       |                         |                         |       |
|                                             | b     | se   | p     | 95% CI<br>(Lower Limit) | 95% CI<br>(Upper Limit) |       |
| One Loss: Yes <sup>a</sup>                  | 0.09  | 0.05 | 0.083 | -0.01                   | 0.20                    |       |
| Two or More Losses: Yes <sup>a</sup>        | 0.06  | 0.09 | 0.509 | -0.12                   | 0.24                    |       |
| Age                                         | 0.00  | 0.01 | 0.914 | -0.03                   | 0.03                    |       |
| Race: Black <sup>b</sup>                    | -0.17 | 0.10 | 0.100 | -0.37                   | 0.03                    |       |
| Parent Education: High School <sup>c</sup>  | 0.27  | 0.06 | 0.000 | ***                     | 0.15                    | 0.39  |
| Parent Education: Some College <sup>c</sup> | 0.15  | 0.06 | 0.014 | *                       | 0.03                    | 0.28  |
| Gender: Female <sup>d</sup>                 | 0.09  | 0.04 | 0.033 | *                       | 0.01                    | 0.18  |
| Proportion of Households under<br>Poverty   | 0.19  | 0.25 | 0.444 | -0.30                   | 0.68                    |       |
| No. of Household Members                    | -0.01 | 0.02 | 0.654 | -0.06                   | 0.03                    |       |
| Caregiver Smokes: Yes <sup>e</sup>          | 0.06  | 0.05 | 0.232 | -0.04                   | 0.17                    |       |
| Epigenetic Assay: Batch 1 <sup>f</sup>      | -0.24 | 0.15 | 0.117 | -0.55                   | 0.06                    |       |
| Epigenetic Assay: Batch 2 <sup>f</sup>      | -0.26 | 0.16 | 0.102 | -0.57                   | 0.05                    |       |
| One Loss* Race                              | -0.15 | 0.15 | 0.341 | -0.45                   | 0.16                    |       |
| Two or More Losses*Race                     | 0.16  | 0.18 | 0.356 | -0.19                   | 0.52                    |       |
| GrimAge                                     |       |      |       |                         |                         |       |

|                                             | b     | se   | p     |     | 95% CI<br>(Lower Limit) | 95% CI<br>(Upper Limit) |
|---------------------------------------------|-------|------|-------|-----|-------------------------|-------------------------|
| One Loss: Yes <sup>a</sup>                  | 0.23  | 0.06 | 0.000 | *** | 0.12                    | 0.35                    |
| Two or More Losses: Yes <sup>a</sup>        | 0.22  | 0.12 | 0.075 |     | -0.02                   | 0.47                    |
| Age                                         | -0.05 | 0.01 | 0.000 | *** | -0.07                   | -0.02                   |
| Race: Black <sup>b</sup>                    | 0.12  | 0.08 | 0.166 |     | -0.05                   | 0.28                    |
| Parent Education: High School <sup>c</sup>  | 0.44  | 0.07 | 0.000 | *** | 0.31                    | 0.57                    |
| Parent Education: Some College <sup>c</sup> | 0.30  | 0.06 | 0.000 | *** | 0.19                    | 0.42                    |
| Gender: Female <sup>d</sup>                 | -0.41 | 0.05 | 0.000 | *** | -0.51                   | -0.31                   |
| Proportion of Households under<br>Poverty   | 0.60  | 0.28 | 0.033 | *   | 0.05                    | 1.15                    |
| No. of Household Members                    | 0.03  | 0.02 | 0.232 |     | -0.02                   | 0.08                    |
| Caregiver Smokes: Yes <sup>e</sup>          | 0.44  | 0.06 | 0.000 | *** | 0.33                    | 0.56                    |
| Epigenetic Assay: Batch 1 <sup>f</sup>      | -0.20 | 0.31 | 0.525 |     | -0.82                   | 0.42                    |
| Epigenetic Assay: Batch 2 <sup>f</sup>      | 0.15  | 0.31 | 0.628 |     | -0.46                   | 0.76                    |
| One Loss* Race                              | -0.14 | 0.13 | 0.291 |     | -0.40                   | 0.12                    |
| Two or More Losses*Race                     | 0.12  | 0.19 | 0.545 |     | -0.27                   | 0.50                    |
| DunedinPACE                                 |       |      |       |     |                         |                         |

|                                             | b     | se   | p    |     | 95% CI<br>(Lower Limit) | 95% CI<br>(Upper Limit) |
|---------------------------------------------|-------|------|------|-----|-------------------------|-------------------------|
| One Loss: Yes <sup>a</sup>                  | 0.21  | 0.05 | 0.00 | *** | 0.11                    | 0.32                    |
| Two or More Losses: Yes <sup>a</sup>        | 0.12  | 0.09 | 0.18 |     | -0.06                   | 0.29                    |
| Age                                         | 0.02  | 0.01 | 0.03 | *   | 0.00                    | 0.05                    |
| Race: Black <sup>b</sup>                    | 0.35  | 0.09 | 0.00 | *** | 0.17                    | 0.53                    |
| Parent Education: High School <sup>c</sup>  | 0.51  | 0.06 | 0.00 | *** | 0.40                    | 0.63                    |
| Parent Education: Some College <sup>c</sup> | 0.31  | 0.05 | 0.00 | *** | 0.20                    | 0.42                    |
| Gender: Female <sup>d</sup>                 | 0.16  | 0.04 | 0.00 | *** | 0.08                    | 0.25                    |
| Proportion of Households under<br>Poverty   | 0.58  | 0.24 | 0.02 | *   | 0.11                    | 1.05                    |
| No. of Household Members                    | 0.02  | 0.02 | 0.25 |     | -0.02                   | 0.06                    |
| Caregiver Smokes: Yes <sup>e</sup>          | 0.19  | 0.06 | 0.00 | **  | 0.07                    | 0.30                    |
| Epigenetic Assay: Batch 1 <sup>f</sup>      | 0.15  | 0.15 | 0.32 |     | -0.14                   | 0.43                    |
| Epigenetic Assay: Batch 2 <sup>f</sup>      | 0.22  | 0.14 | 0.13 |     | -0.06                   | 0.50                    |
| One Loss* Race                              | -0.14 | 0.14 | 0.31 |     | -0.42                   | 0.14                    |
| Two or More Losses*Race                     | 0.29  | 0.17 | 0.08 | .   | -0.04                   | 0.62                    |

Note: a = No Loss (reference) b = White (reference); c = College or Higher reference; d = Male (reference); e = No (reference); f = Batch 3 (reference)

\* $p \leq 0.05$ ; \*\* $p \leq 0.01$ ; \*\*\* $p \leq 0.001$



eTable 14. Parental Loss at Any Time Period (Childhood to Adulthood) and Biological Aging ( $n = 3,362$ )

| Horvath                                     |       |      |       |     |                         |                         |
|---------------------------------------------|-------|------|-------|-----|-------------------------|-------------------------|
|                                             | b     | se   | p     |     | 95% CI<br>(Lower Limit) | 95% CI<br>(Upper Limit) |
| Parental Loss: Yes <sup>a</sup>             | -0.02 | 0.05 | 0.730 |     | -0.12                   | 0.08                    |
| Age                                         | -0.01 | 0.01 | 0.246 |     | -0.04                   | 0.01                    |
| Race: Black <sup>b</sup>                    | -0.07 | 0.10 | 0.459 |     | -0.26                   | 0.12                    |
| Parent Education: High School <sup>c</sup>  | 0.10  | 0.07 | 0.159 |     | -0.04                   | 0.23                    |
| Parent Education: Some College <sup>c</sup> | -0.02 | 0.05 | 0.754 |     | -0.11                   | 0.08                    |
| Gender: Female <sup>d</sup>                 | -0.36 | 0.05 | 0.000 | *** | -0.46                   | -0.27                   |
| Proportion of Households under Poverty      | 0.23  | 0.19 | 0.235 |     | -0.15                   | 0.62                    |
| No. of Household Members                    | 0.03  | 0.02 | 0.155 |     | -0.01                   | 0.07                    |
| Caregiver Smokes: Yes <sup>e</sup>          | -0.10 | 0.06 | 0.064 |     | -0.22                   | 0.01                    |
| Epigenetic Assay: Batch 1 <sup>f</sup>      | 0.32  | 0.28 | 0.252 |     | -0.23                   | 0.86                    |
| Epigenetic Assay: Batch 2 <sup>f</sup>      | 0.37  | 0.27 | 0.170 |     | -0.16                   | 0.91                    |
| Parental Loss*Race                          | 0.05  | 0.12 | 0.690 |     | -0.19                   | 0.28                    |
| PhenoAge                                    |       |      |       |     |                         |                         |
|                                             | b     | se   | p     |     | 95% CI<br>(Lower Limit) | 95% CI<br>(Upper Limit) |
| Parental Loss: Yes <sup>a</sup>             | 0.10  | 0.06 | 0.084 |     | -0.01                   | 0.21                    |
| Age                                         | 0.00  | 0.01 | 0.957 |     | -0.03                   | 0.03                    |
| Race: Black <sup>b</sup>                    | -0.23 | 0.10 | 0.019 | *   | -0.42                   | -0.04                   |
| Parent Education: High School <sup>c</sup>  | 0.27  | 0.06 | 0.000 | *** | 0.15                    | 0.39                    |
| Parent Education: Some College <sup>c</sup> | 0.16  | 0.06 | 0.012 | *   | 0.04                    | 0.28                    |
| Gender: Female <sup>d</sup>                 | 0.10  | 0.04 | 0.021 | *   | 0.02                    | 0.19                    |
| Proportion of Households under Poverty      | 0.19  | 0.25 | 0.450 |     | -0.31                   | 0.69                    |
| No. of Household Members                    | -0.01 | 0.02 | 0.762 |     | -0.05                   | 0.04                    |
| Caregiver Smokes: Yes <sup>e</sup>          | 0.05  | 0.05 | 0.304 |     | -0.05                   | 0.16                    |
| Epigenetic Assay: Batch 1 <sup>f</sup>      | -0.26 | 0.15 | 0.096 |     | -0.56                   | 0.05                    |
| Epigenetic Assay: Batch 2 <sup>f</sup>      | -0.27 | 0.16 | 0.080 |     | -0.58                   | 0.03                    |
| Parental Loss*Race                          | 0.08  | 0.13 | 0.545 |     | -0.18                   | 0.34                    |
| GrimAge                                     |       |      |       |     |                         |                         |
|                                             | b     | se   | p     |     | 95% CI<br>(Lower Limit) | 95% CI<br>(Upper Limit) |
| Parental Loss: Yes <sup>a</sup>             | 0.23  | 0.06 | 0.000 | *** | 0.11                    | 0.35                    |
| Age                                         | -0.05 | 0.01 | 0.001 | *** | -0.07                   | -0.02                   |
| Race: Black <sup>b</sup>                    | 0.10  | 0.08 | 0.186 |     | -0.05                   | 0.26                    |

|                                             |       |      |       |     |       |       |
|---------------------------------------------|-------|------|-------|-----|-------|-------|
| Parent Education: High School <sup>c</sup>  | 0.46  | 0.07 | 0.000 | *** | 0.33  | 0.59  |
| Parent Education: Some College <sup>c</sup> | 0.31  | 0.06 | 0.000 | *** | 0.19  | 0.43  |
| Gender: Female <sup>d</sup>                 | -0.40 | 0.05 | 0.000 | *** | -0.50 | -0.31 |
| Proportion of Households under Poverty      | 0.62  | 0.28 | 0.031 | *   | 0.06  | 1.18  |
| No. of Household Members                    | 0.03  | 0.02 | 0.176 |     | -0.02 | 0.08  |
| Caregiver Smokes: Yes <sup>e</sup>          | 0.44  | 0.06 | 0.000 | *** | 0.32  | 0.55  |
| Epigenetic Assay: Batch 1 <sup>f</sup>      | -0.21 | 0.31 | 0.497 |     | -0.83 | 0.40  |
| Epigenetic Assay: Batch 2 <sup>f</sup>      | 0.13  | 0.30 | 0.658 |     | -0.47 | 0.74  |
| Parental Loss*Race                          | -0.03 | 0.12 | 0.826 |     | -0.26 | 0.21  |

DunedinPACE

|                                             | b    | se   | p     |     | 95% CI<br>(Lower Limit) | 95% CI<br>(Upper Limit) |
|---------------------------------------------|------|------|-------|-----|-------------------------|-------------------------|
| Parental Loss: Yes <sup>a</sup>             | 0.18 | 0.05 | 0.000 | *** | 0.09                    | 0.28                    |
| Age                                         | 0.03 | 0.01 | 0.023 | *   | 0.00                    | 0.05                    |
| Race: Black <sup>b</sup>                    | 0.29 | 0.09 | 0.001 | **  | 0.11                    | 0.46                    |
| Parent Education: High School <sup>c</sup>  | 0.52 | 0.06 | 0.000 | *** | 0.41                    | 0.64                    |
| Parent Education: Some College <sup>c</sup> | 0.32 | 0.05 | 0.000 | *** | 0.21                    | 0.42                    |
| Gender: Female <sup>d</sup>                 | 0.18 | 0.04 | 0.000 | *** | 0.09                    | 0.26                    |
| Proportion of Households under Poverty      | 0.59 | 0.24 | 0.016 | *   | 0.11                    | 1.06                    |
| No. of Household Members                    | 0.03 | 0.02 | 0.167 |     | -0.01                   | 0.07                    |
| Caregiver Smokes: Yes <sup>e</sup>          | 0.17 | 0.06 | 0.003 | **  | 0.06                    | 0.29                    |
| Epigenetic Assay: Batch 1 <sup>f</sup>      | 0.13 | 0.14 | 0.372 |     | -0.15                   | 0.41                    |
| Epigenetic Assay: Batch 2 <sup>f</sup>      | 0.20 | 0.14 | 0.163 |     | -0.08                   | 0.47                    |
| Parental Loss*Race                          | 0.14 | 0.11 | 0.232 |     | -0.09                   | 0.36                    |

Note: a = No Loss (reference) b = White (reference); c = College or Higher reference; d = Male (reference); e = No (reference); f = Batch 3 (reference)

\* $p \leq 0.05$ ; \*\* $p \leq 0.01$ ; \*\*\* $p \leq 0.001$

eTable 15. Any Loss in Childhood and in Adulthood and Biological Aging (*n* = 3,362)

| Horvath                                     |       |      |       |                         |                         |       |
|---------------------------------------------|-------|------|-------|-------------------------|-------------------------|-------|
|                                             | b     | se   | p     | 95% CI<br>(Lower Limit) | 95% CI<br>(Upper Limit) |       |
| Any Loss in Childhood: Yes <sup>a</sup>     | 0.04  | 0.10 | 0.651 | -0.15                   | 0.24                    |       |
| Any Loss in Adulthood: Yes <sup>a</sup>     | -0.03 | 0.06 | 0.575 | -0.14                   | 0.08                    |       |
| Age                                         | -0.01 | 0.01 | 0.247 | -0.04                   | 0.01                    |       |
| Race: Black <sup>b</sup>                    | -0.04 | 0.10 | 0.689 | -0.23                   | 0.15                    |       |
| Parent Education: High School <sup>c</sup>  | 0.10  | 0.07 | 0.151 | -0.04                   | 0.23                    |       |
| Parent Education: Some College <sup>c</sup> | -0.02 | 0.05 | 0.759 | -0.11                   | 0.08                    |       |
| Gender: Female <sup>d</sup>                 | -0.36 | 0.05 | 0.000 | ***                     | -0.45                   | -0.27 |
| Proportion of Households under Poverty      | 0.25  | 0.20 | 0.204 | -0.14                   | 0.64                    |       |
| No. of Household Members                    | 0.03  | 0.02 | 0.143 | -0.01                   | 0.07                    |       |
| Caregiver Smokes: Yes <sup>e</sup>          | -0.11 | 0.06 | 0.056 | -0.22                   | 0.00                    |       |
| Epigenetic Assay: Batch 1 <sup>f</sup>      | 0.31  | 0.28 | 0.259 | -0.23                   | 0.86                    |       |
| Epigenetic Assay: Batch 2 <sup>f</sup>      | 0.37  | 0.27 | 0.177 | -0.17                   | 0.90                    |       |
| Any Loss in Childhood* Race                 | -0.29 | 0.17 | 0.100 | -0.63                   | 0.06                    |       |
| Any Loss in Adulthood*Race                  | 0.07  | 0.14 | 0.619 | -0.20                   | 0.34                    |       |
| PhenoAge                                    |       |      |       |                         |                         |       |
|                                             | b     | se   | p     | 95% CI<br>(Lower Limit) | 95% CI<br>(Upper Limit) |       |
| Any Loss in Childhood: Yes <sup>a</sup>     | 0.04  | 0.10 | 0.694 | -0.16                   | 0.24                    |       |
| Any Loss in Adulthood: Yes <sup>a</sup>     | 0.08  | 0.06 | 0.169 | -0.03                   | 0.19                    |       |
| Age                                         | 0.00  | 0.01 | 0.980 | -0.03                   | 0.03                    |       |
| Race: Black <sup>b</sup>                    | -0.21 | 0.10 | 0.037 | *                       | -0.40                   | -0.01 |
| Parent Education: High School <sup>c</sup>  | 0.27  | 0.06 | 0.000 | ***                     | 0.15                    | 0.39  |
| Parent Education: Some College <sup>c</sup> | 0.16  | 0.06 | 0.013 | *                       | 0.03                    | 0.28  |
| Gender: Female <sup>d</sup>                 | 0.10  | 0.04 | 0.024 | *                       | 0.01                    | 0.18  |
| Proportion of Households under Poverty      | 0.20  | 0.25 | 0.436 | -0.30                   | 0.69                    |       |
| No. of Household Members                    | -0.01 | 0.02 | 0.719 | -0.05                   | 0.04                    |       |
| Caregiver Smokes: Yes <sup>e</sup>          | 0.06  | 0.05 | 0.273 | -0.05                   | 0.16                    |       |
| Epigenetic Assay: Batch 1 <sup>f</sup>      | -0.24 | 0.15 | 0.114 | -0.55                   | 0.06                    |       |
| Epigenetic Assay: Batch 2 <sup>f</sup>      | -0.26 | 0.16 | 0.096 | -0.57                   | 0.05                    |       |
| Any Loss in Childhood* Race                 | 0.09  | 0.20 | 0.662 | -0.30                   | 0.48                    |       |
| Any Loss in Adulthood*Race                  | 0.01  | 0.14 | 0.940 | -0.26                   | 0.28                    |       |
| GrimAge                                     |       |      |       |                         |                         |       |
|                                             | b     | se   | p     | 95% CI<br>(Lower Limit) | 95% CI<br>(Upper Limit) |       |

|                                             |       |      |       |     |       |       |
|---------------------------------------------|-------|------|-------|-----|-------|-------|
| Any Loss in Childhood: Yes <sup>a</sup>     | 0.09  | 0.11 | 0.430 |     | -0.13 | 0.30  |
| Any Loss in Adulthood: Yes <sup>a</sup>     | 0.19  | 0.06 | 0.002 | **  | 0.07  | 0.30  |
| Age                                         | -0.05 | 0.01 | 0.001 | *** | -0.07 | -0.02 |
| Race: Black <sup>b</sup>                    | 0.10  | 0.09 | 0.247 |     | -0.07 | 0.28  |
| Parent Education: High School <sup>c</sup>  | 0.46  | 0.07 | 0.000 | *** | 0.33  | 0.59  |
| Parent Education: Some College <sup>c</sup> | 0.31  | 0.06 | 0.000 | *** | 0.19  | 0.43  |
| Gender: Female <sup>d</sup>                 | -0.41 | 0.05 | 0.000 | *** | -0.50 | -0.31 |
| Proportion of Households under Poverty      | 0.61  | 0.28 | 0.030 | *   | 0.06  | 1.16  |
| No. of Household Members                    | 0.03  | 0.02 | 0.208 |     | -0.02 | 0.08  |
| Caregiver Smokes: Yes <sup>e</sup>          | 0.44  | 0.06 | 0.000 | *** | 0.32  | 0.56  |
| Epigenetic Assay: Batch 1 <sup>f</sup>      | -0.19 | 0.31 | 0.546 |     | -0.81 | 0.43  |
| Epigenetic Assay: Batch 2 <sup>f</sup>      | 0.16  | 0.31 | 0.610 |     | -0.45 | 0.76  |
| Any Loss in Childhood* Race                 | 0.14  | 0.20 | 0.487 |     | -0.25 | 0.52  |
| Any Loss in Adulthood*Race                  | -0.05 | 0.14 | 0.691 |     | -0.32 | 0.22  |

DunedinPACE

|                                             | b    | se   | p     |     | 95% CI<br>(Lower Limit) | 95% CI<br>(Upper Limit) |
|---------------------------------------------|------|------|-------|-----|-------------------------|-------------------------|
| Any Loss in Childhood: Yes <sup>a</sup>     | 0.05 | 0.11 | 0.622 |     | -0.16                   | 0.27                    |
| Any Loss in Adulthood: Yes <sup>a</sup>     | 0.16 | 0.05 | 0.002 | **  | 0.06                    | 0.26                    |
| Age                                         | 0.03 | 0.01 | 0.021 | *   | 0.00                    | 0.05                    |
| Race: Black <sup>b</sup>                    | 0.33 | 0.09 | 0.000 | *** | 0.15                    | 0.50                    |
| Parent Education: High School <sup>c</sup>  | 0.52 | 0.06 | 0.000 | *** | 0.40                    | 0.64                    |
| Parent Education: Some College <sup>c</sup> | 0.31 | 0.05 | 0.000 | *** | 0.21                    | 0.42                    |
| Gender: Female <sup>d</sup>                 | 0.17 | 0.04 | 0.000 | *** | 0.08                    | 0.26                    |
| Proportion of Households under Poverty      | 0.59 | 0.24 | 0.015 | *   | 0.12                    | 1.07                    |
| No. of Household Members                    | 0.03 | 0.02 | 0.200 |     | -0.01                   | 0.07                    |
| Caregiver Smokes: Yes <sup>e</sup>          | 0.18 | 0.06 | 0.002 | **  | 0.07                    | 0.29                    |
| Epigenetic Assay: Batch 1 <sup>f</sup>      | 0.15 | 0.15 | 0.310 |     | -0.14                   | 0.43                    |
| Epigenetic Assay: Batch 2 <sup>f</sup>      | 0.22 | 0.14 | 0.129 |     | -0.06                   | 0.50                    |
| Any Loss in Childhood* Race                 | 0.17 | 0.17 | 0.299 |     | -0.16                   | 0.50                    |
| Any Loss in Adulthood*Race                  | 0.02 | 0.13 | 0.855 |     | -0.23                   | 0.28                    |

Note: a = No Loss (reference) b = White (reference); c = College or Higher reference; d = Male (reference); e = No (reference); f = Batch 3 (reference)

\* $p \leq 0.05$ ; \*\* $p \leq 0.01$ ; \*\*\* $p \leq 0.001$

eTable 16. Parental Loss in Childhood and in Adulthood and Biological Aging (*n* = 3,362)

| Horvath                                      |       |      |       |                         |                         |       |
|----------------------------------------------|-------|------|-------|-------------------------|-------------------------|-------|
|                                              | b     | se   | p     | 95% CI<br>(Lower Limit) | 95% CI<br>(Upper Limit) |       |
| Parental Loss in Childhood: Yes <sup>a</sup> | -0.02 | 0.11 | 0.855 | -0.23                   | 0.19                    |       |
| Parental Loss in Adulthood: Yes <sup>a</sup> | -0.01 | 0.06 | 0.915 | -0.12                   | 0.11                    |       |
| Age                                          | -0.01 | 0.01 | 0.228 | -0.04                   | 0.01                    |       |
| Race: Black <sup>b</sup>                     | -0.09 | 0.09 | 0.370 | -0.27                   | 0.10                    |       |
| Parent Education: High School <sup>c</sup>   | 0.10  | 0.07 | 0.152 | -0.04                   | 0.23                    |       |
| Parent Education: Some College <sup>c</sup>  | -0.02 | 0.05 | 0.762 | -0.11                   | 0.08                    |       |
| Gender: Female <sup>d</sup>                  | -0.36 | 0.05 | 0.000 | ***                     | -0.45                   | -0.27 |
| Proportion of Households under Poverty       | 0.23  | 0.20 | 0.251 | -0.16                   | 0.61                    |       |
| No. of Household Members                     | 0.03  | 0.02 | 0.148 | -0.01                   | 0.07                    |       |
| Caregiver Smokes: Yes <sup>e</sup>           | -0.11 | 0.06 | 0.053 | -0.22                   | 0.00                    |       |
| Epigenetic Assay: Batch 1 <sup>f</sup>       | 0.32  | 0.27 | 0.247 | -0.22                   | 0.86                    |       |
| Epigenetic Assay: Batch 2 <sup>f</sup>       | 0.37  | 0.27 | 0.170 | -0.16                   | 0.90                    |       |
| Parental Loss in Childhood* Race             | -0.13 | 0.19 | 0.487 | -0.51                   | 0.25                    |       |
| Parental Loss in Adulthood*Race              | 0.13  | 0.14 | 0.354 | -0.15                   | 0.41                    |       |
| PhenoAge                                     |       |      |       |                         |                         |       |
|                                              | b     | se   | p     | 95% CI<br>(Lower Limit) | 95% CI<br>(Upper Limit) |       |
| Parental Loss in Childhood: Yes <sup>a</sup> | 0.01  | 0.11 | 0.902 | -0.21                   | 0.23                    |       |
| Parental Loss in Adulthood: Yes <sup>a</sup> | 0.11  | 0.06 | 0.070 | -0.01                   | 0.22                    |       |
| Age                                          | 0.00  | 0.01 | 0.937 | -0.03                   | 0.03                    |       |
| Race: Black <sup>b</sup>                     | -0.22 | 0.09 | 0.016 | *                       | -0.41                   | -0.04 |
| Parent Education: High School <sup>c</sup>   | 0.27  | 0.06 | 0.000 | ***                     | 0.15                    | 0.39  |
| Parent Education: Some College <sup>c</sup>  | 0.16  | 0.06 | 0.013 | *                       | 0.03                    | 0.28  |
| Gender: Female <sup>d</sup>                  | 0.10  | 0.04 | 0.023 | *                       | 0.01                    | 0.18  |
| Proportion of Households under Poverty       | 0.20  | 0.25 | 0.437 | -0.30                   | 0.70                    |       |
| No. of Household Members                     | -0.01 | 0.02 | 0.741 | -0.05                   | 0.04                    |       |
| Caregiver Smokes: Yes <sup>e</sup>           | 0.06  | 0.05 | 0.273 | -0.05                   | 0.16                    |       |
| Epigenetic Assay: Batch 1 <sup>f</sup>       | -0.26 | 0.15 | 0.095 | .                       | -0.56                   | 0.05  |
| Epigenetic Assay: Batch 2 <sup>f</sup>       | -0.27 | 0.16 | 0.081 | .                       | -0.58                   | 0.03  |
| Parental Loss in Childhood* Race             | 0.25  | 0.19 | 0.205 | -0.14                   | 0.63                    |       |
| Parental Loss in Adulthood*Race              | 0.02  | 0.14 | 0.859 | -0.25                   | 0.30                    |       |
| GrimAge                                      |       |      |       |                         |                         |       |
|                                              | b     | se   | p     | 95% CI<br>(Lower Limit) | 95% CI<br>(Upper Limit) |       |
| Parental Loss in Childhood: Yes <sup>a</sup> | 0.14  | 0.13 | 0.275 | -0.11                   | 0.39                    |       |

|                                              |       |      |       |     |       |       |
|----------------------------------------------|-------|------|-------|-----|-------|-------|
| Parental Loss in Adulthood: Yes <sup>a</sup> | 0.19  | 0.06 | 0.002 | **  | 0.07  | 0.30  |
| Age                                          | -0.05 | 0.01 | 0.001 | *** | -0.07 | -0.02 |
| Race: Black <sup>b</sup>                     | 0.11  | 0.08 | 0.179 |     | -0.05 | 0.27  |
| Parent Education: High School <sup>c</sup>   | 0.46  | 0.07 | 0.000 | *** | 0.33  | 0.59  |
| Parent Education: Some College <sup>c</sup>  | 0.31  | 0.06 | 0.000 | *** | 0.19  | 0.43  |
| Gender: Female <sup>d</sup>                  | -0.40 | 0.05 | 0.000 | *** | -0.50 | -0.31 |
| Proportion of Households under Poverty       | 0.63  | 0.28 | 0.027 | *   | 0.07  | 1.19  |
| No. of Household Members                     | 0.03  | 0.02 | 0.186 |     | -0.02 | 0.08  |
| Caregiver Smokes: Yes <sup>e</sup>           | 0.44  | 0.06 | 0.000 | *** | 0.32  | 0.56  |
| Epigenetic Assay: Batch 1 <sup>f</sup>       | -0.20 | 0.31 | 0.515 |     | -0.82 | 0.41  |
| Epigenetic Assay: Batch 2 <sup>f</sup>       | 0.14  | 0.30 | 0.639 |     | -0.46 | 0.75  |
| Parental Loss in Childhood* Race             | 0.02  | 0.21 | 0.911 |     | -0.40 | 0.44  |
| Parental Loss in Adulthood*Race              | -0.03 | 0.14 | 0.829 |     | -0.30 | 0.24  |

DunedinPACE

|                                              | b    | se   | p     |     | 95% CI<br>(Lower Limit) | 95% CI<br>(Upper Limit) |
|----------------------------------------------|------|------|-------|-----|-------------------------|-------------------------|
| Parental Loss in Childhood: Yes <sup>a</sup> | 0.09 | 0.12 | 0.427 |     | -0.14                   | 0.33                    |
| Parental Loss in Adulthood: Yes <sup>a</sup> | 0.16 | 0.05 | 0.003 | **  | 0.06                    | 0.26                    |
| Age                                          | 0.03 | 0.01 | 0.021 | *   | 0.00                    | 0.05                    |
| Race: Black <sup>b</sup>                     | 0.29 | 0.09 | 0.002 | **  | 0.11                    | 0.47                    |
| Parent Education: High School <sup>c</sup>   | 0.53 | 0.06 | 0.000 | *** | 0.41                    | 0.65                    |
| Parent Education: Some College <sup>c</sup>  | 0.32 | 0.05 | 0.000 | *** | 0.21                    | 0.42                    |
| Gender: Female <sup>d</sup>                  | 0.17 | 0.04 | 0.000 | *** | 0.09                    | 0.26                    |
| Proportion of Households under Poverty       | 0.60 | 0.24 | 0.014 | *   | 0.13                    | 1.07                    |
| No. of Household Members                     | 0.03 | 0.02 | 0.184 |     | -0.01                   | 0.07                    |
| Caregiver Smokes: Yes <sup>e</sup>           | 0.18 | 0.06 | 0.003 | **  | 0.06                    | 0.29                    |
| Epigenetic Assay: Batch 1 <sup>f</sup>       | 0.13 | 0.14 | 0.349 |     | -0.15                   | 0.41                    |
| Epigenetic Assay: Batch 2 <sup>f</sup>       | 0.20 | 0.14 | 0.148 |     | -0.07                   | 0.47                    |
| Parental Loss in Childhood* Race             | 0.17 | 0.19 | 0.367 |     | -0.20                   | 0.54                    |
| Parental Loss in Adulthood*Race              | 0.14 | 0.13 | 0.278 |     | -0.11                   | 0.39                    |

Note: a = No Loss (reference) b = White (reference); c = College or Higher reference; d = Male (reference); e = No (reference); f = Batch 3 (reference)

\* $p \leq 0.05$ ; \*\* $p \leq 0.01$ ; \*\*\* $p \leq 0.001$

eTable 17. Parental Loss by Gender of Parent at Any Time Period (Childhood to Adulthood) and Biological Aging (n = 3,963)

|                                                           | Horvath  |      |      | 95% CI<br>(Lower Limit) | 95% CI<br>(Upper Limit) |       |
|-----------------------------------------------------------|----------|------|------|-------------------------|-------------------------|-------|
|                                                           | b        | se   | p    |                         |                         |       |
| Parental Loss (Mother or Mother Figure): Yes <sup>a</sup> | 0.00     | 0.07 | 0.98 | -0.13                   | 0.13                    |       |
| Parental Loss (Father or Father Figure): Yes <sup>a</sup> | -0.02    | 0.05 | 0.71 | -0.11                   | 0.08                    |       |
| Age                                                       | -0.02    | 0.01 | 0.14 | -0.04                   | 0.01                    |       |
| Race: Black <sup>b</sup>                                  | -0.04    | 0.07 | 0.62 | -0.18                   | 0.11                    |       |
| Race: Hispanic <sup>b</sup>                               | -0.16    | 0.10 | 0.11 | -0.36                   | 0.03                    |       |
| Race: Other <sup>b,c</sup>                                | 0.09     | 0.08 | 0.27 | -0.07                   | 0.26                    |       |
| Parent Education: High School <sup>d</sup>                | 0.13     | 0.06 | 0.04 | *                       | 0.01                    | 0.25  |
| Parent Education: Some College <sup>d</sup>               | 0.02     | 0.05 | 0.65 | -0.08                   | 0.12                    |       |
| Gender: Female <sup>e</sup>                               | -0.36    | 0.04 | 0.00 | ***                     | -0.45                   | -0.28 |
| Proportion of Households under Poverty                    | 0.06     | 0.20 | 0.75 | -0.33                   | 0.45                    |       |
| No. of Household Members                                  | 0.02     | 0.02 | 0.34 | -0.02                   | 0.06                    |       |
| Caregiver Smokes: Yes <sup>f</sup>                        | -0.08    | 0.06 | 0.18 | -0.20                   | 0.04                    |       |
| Epigenetic Assay: Batch 1 <sup>g</sup>                    | 0.33     | 0.24 | 0.16 | -0.13                   | 0.80                    |       |
| Epigenetic Assay: Batch 2 <sup>g</sup>                    | 0.40     | 0.23 | 0.08 | -0.05                   | 0.86                    |       |
|                                                           | PhenoAge |      |      | 95% CI<br>(Lower Limit) | 95% CI<br>(Upper Limit) |       |
|                                                           | b        | se   | p    |                         |                         |       |
| Parental Loss (Mother or Mother Figure): Yes <sup>a</sup> | 0.13     | 0.06 | 0.04 | *                       | 0.01                    | 0.25  |
| Parental Loss (Father or Father Figure): Yes <sup>a</sup> | 0.09     | 0.05 | 0.08 |                         | -0.01                   | 0.20  |
| Age                                                       | -0.01    | 0.01 | 0.42 |                         | -0.04                   | 0.01  |
| Race: Black <sup>b</sup>                                  | -0.20    | 0.07 | 0.01 | **                      | -0.34                   | -0.05 |
| Race: Hispanic <sup>b</sup>                               | -0.05    | 0.10 | 0.64 |                         | -0.25                   | 0.16  |
| Race: Other <sup>b,c</sup>                                | -0.01    | 0.13 | 0.96 |                         | -0.27                   | 0.26  |
| Parent Education: High School <sup>d</sup>                | 0.27     | 0.05 | 0.00 | ***                     | 0.16                    | 0.38  |
| Parent Education: Some College <sup>d</sup>               | 0.16     | 0.06 | 0.01 | **                      | 0.04                    | 0.28  |
| Gender: Female <sup>e</sup>                               | 0.11     | 0.04 | 0.01 | **                      | 0.03                    | 0.19  |
| Proportion of Households under Poverty                    | 0.12     | 0.24 | 0.62 |                         | -0.36                   | 0.60  |
| No. of Household Members                                  | -0.01    | 0.02 | 0.72 |                         | -0.05                   | 0.03  |
| Caregiver Smokes: Yes <sup>f</sup>                        | 0.07     | 0.05 | 0.17 |                         | -0.03                   | 0.18  |
| Epigenetic Assay: Batch 1 <sup>g</sup>                    | -0.15    | 0.15 | 0.31 |                         | -0.45                   | 0.15  |
| Epigenetic Assay: Batch 2 <sup>g</sup>                    | -0.16    | 0.16 | 0.31 |                         | -0.47                   | 0.15  |
|                                                           | GrimAge  |      |      | 95% CI<br>(Lower Limit) | 95% CI<br>(Upper Limit) |       |
|                                                           | b        | se   | p    |                         |                         |       |

|                                                           | b     | se   | p    |     | 95% CI<br>(Lower Limit) | 95% CI<br>(Upper Limit) |
|-----------------------------------------------------------|-------|------|------|-----|-------------------------|-------------------------|
| Parental Loss (Mother or Mother Figure): Yes <sup>a</sup> | 0.16  | 0.07 | 0.02 | *   | 0.02                    | 0.30                    |
| Parental Loss (Father or Father Figure): Yes <sup>a</sup> | 0.18  | 0.05 | 0.00 | *** | 0.08                    | 0.28                    |
| Age                                                       | -0.05 | 0.01 | 0.00 | *** | -0.07                   | -0.03                   |
| Race: Black <sup>b</sup>                                  | 0.13  | 0.07 | 0.05 |     | 0.00                    | 0.26                    |
| Race: Hispanic <sup>b</sup>                               | -0.41 | 0.09 | 0.00 | *** | -0.59                   | -0.23                   |
| Race: Other <sup>b,c</sup>                                | -0.02 | 0.10 | 0.88 |     | -0.22                   | 0.19                    |
| Parent Education: High School <sup>d</sup>                | 0.41  | 0.06 | 0.00 | *** | 0.29                    | 0.53                    |
| Parent Education: Some College <sup>d</sup>               | 0.29  | 0.05 | 0.00 | *** | 0.19                    | 0.40                    |
| Gender: Female <sup>e</sup>                               | -0.40 | 0.04 | 0.00 | *** | -0.48                   | -0.31                   |
| Proportion of Households under Poverty                    | 0.49  | 0.25 | 0.05 | *   | 0.01                    | 0.98                    |
| No. of Household Members                                  | 0.02  | 0.02 | 0.35 |     | -0.02                   | 0.06                    |
| Caregiver Smokes: Yes <sup>f</sup>                        | 0.46  | 0.06 | 0.00 | *** | 0.35                    | 0.58                    |
| Epigenetic Assay: Batch 1 <sup>g</sup>                    | -0.16 | 0.29 | 0.58 |     | -0.73                   | 0.41                    |
| Epigenetic Assay: Batch 2 <sup>g</sup>                    | 0.20  | 0.28 | 0.47 |     | -0.35                   | 0.75                    |

DunedinPACE

|                                                           | b    | se   | p    |     | 95% CI<br>(Lower Limit) | 95% CI<br>(Upper Limit) |
|-----------------------------------------------------------|------|------|------|-----|-------------------------|-------------------------|
| Parental Loss (Mother or Mother Figure): Yes <sup>a</sup> | 0.21 | 0.06 | 0.00 | **  | 0.08                    | 0.34                    |
| Parental Loss (Father or Father Figure): Yes <sup>a</sup> | 0.14 | 0.04 | 0.00 | **  | 0.05                    | 0.22                    |
| Age                                                       | 0.02 | 0.01 | 0.12 |     | 0.00                    | 0.04                    |
| Race: Black <sup>b</sup>                                  | 0.35 | 0.07 | 0.00 | *** | 0.22                    | 0.48                    |
| Race: Hispanic <sup>b</sup>                               | 0.07 | 0.11 | 0.50 |     | -0.14                   | 0.29                    |
| Race: Other <sup>b,c</sup>                                | 0.28 | 0.11 | 0.02 | *   | 0.05                    | 0.50                    |
| Parent Education: High School <sup>d</sup>                | 0.50 | 0.05 | 0.00 | *** | 0.40                    | 0.61                    |
| Parent Education: Some College <sup>d</sup>               | 0.30 | 0.05 | 0.00 | *** | 0.19                    | 0.40                    |
| Gender: Female <sup>e</sup>                               | 0.17 | 0.04 | 0.00 | *** | 0.09                    | 0.25                    |
| Proportion of Households under Poverty                    | 0.65 | 0.23 | 0.01 | **  | 0.20                    | 1.11                    |
| No. of Household Members                                  | 0.02 | 0.02 | 0.38 |     | -0.02                   | 0.05                    |
| Caregiver Smokes: Yes <sup>f</sup>                        | 0.20 | 0.06 | 0.00 | *** | 0.08                    | 0.31                    |
| Epigenetic Assay: Batch 1 <sup>g</sup>                    | 0.06 | 0.13 | 0.61 |     | -0.18                   | 0.31                    |
| Epigenetic Assay: Batch 2 <sup>g</sup>                    | 0.13 | 0.12 | 0.26 |     | -0.10                   | 0.37                    |

Note: a = No Loss (reference) b = White (reference); c = Asian, Native American, Pacific Islander, Other (other race or multi-racial); d = College or Higher reference; e = Male (reference); f = No (reference); g = Batch 3 (reference)

\* $p \leq 0.05$ ; \*\* $p \leq 0.01$ ; \*\*\* $p \leq 0.001$



eTable 18. Interaction Between Any Loss in Childhood and in Adulthood and its Association With Biological Aging ( $n = 3,963$ )

|                                             | Horvath |      |      | 95% CI<br>(Lower Limit) | 95% CI<br>(Upper Limit) |       |
|---------------------------------------------|---------|------|------|-------------------------|-------------------------|-------|
|                                             | b       | se   | p    |                         |                         |       |
| Any Loss in Childhood: Yes <sup>a</sup>     | -0.02   | 0.09 | 0.82 | -0.20                   | 0.16                    |       |
| Any Loss in Adulthood: Yes <sup>a</sup>     | 0.00    | 0.05 | 0.93 | -0.10                   | 0.10                    |       |
| Age                                         | -0.02   | 0.01 | 0.19 | -0.04                   | 0.01                    |       |
| Race: Black <sup>b</sup>                    | -0.03   | 0.08 | 0.70 | -0.18                   | 0.12                    |       |
| Race: Hispanic <sup>b</sup>                 | -0.16   | 0.10 | 0.10 | -0.35                   | 0.03                    |       |
| Race: Other <sup>b,c</sup>                  | 0.10    | 0.08 | 0.27 | -0.07                   | 0.26                    |       |
| Parent Education: High School <sup>d</sup>  | 0.12    | 0.06 | 0.05 | 0.00                    | 0.25                    |       |
| Parent Education: Some College <sup>d</sup> | 0.02    | 0.05 | 0.65 | -0.08                   | 0.12                    |       |
| Gender: Female <sup>e</sup>                 | -0.36   | 0.04 | 0.00 | ***                     | -0.45                   | -0.28 |
| Proportion of Households under Poverty      | 0.10    | 0.19 | 0.59 | -0.28                   | 0.49                    |       |
| No. of Household Members                    | 0.02    | 0.02 | 0.44 | -0.02                   | 0.06                    |       |
| Caregiver Smokes: Yes <sup>f</sup>          | -0.07   | 0.06 | 0.22 | -0.19                   | 0.04                    |       |
| Epigenetic Assay: Batch 1 <sup>g</sup>      | 0.33    | 0.23 | 0.16 | -0.13                   | 0.80                    |       |
| Epigenetic Assay: Batch 2 <sup>g</sup>      | 0.40    | 0.23 | 0.08 | -0.05                   | 0.85                    |       |
| Any Loss in Childhood*Any Loss in Adulthood | -0.13   | 0.17 | 0.43 | -0.46                   | 0.20                    |       |
| PhenoAge                                    |         |      |      |                         |                         |       |
|                                             | b       | se   | p    | 95% CI<br>(Lower Limit) | 95% CI<br>(Upper Limit) |       |
| Any Loss in Childhood: Yes <sup>a</sup>     | 0.19    | 0.11 | 0.08 | -0.03                   | 0.40                    |       |
| Any Loss in Adulthood: Yes <sup>a</sup>     | 0.11    | 0.05 | 0.02 | *                       | 0.02                    | 0.21  |
| Age                                         | -0.01   | 0.01 | 0.56 | -0.03                   | 0.02                    |       |
| Race: Black <sup>b</sup>                    | -0.19   | 0.07 | 0.01 | **                      | -0.33                   | -0.05 |
| Race: Hispanic <sup>b</sup>                 | -0.05   | 0.10 | 0.62 | -0.25                   | 0.15                    |       |
| Race: Other <sup>b,c</sup>                  | 0.00    | 0.13 | 0.98 | -0.27                   | 0.26                    |       |
| Parent Education: High School <sup>d</sup>  | 0.27    | 0.05 | 0.00 | ***                     | 0.16                    | 0.38  |
| Parent Education: Some College <sup>d</sup> | 0.16    | 0.06 | 0.01 | **                      | 0.04                    | 0.28  |
| Gender: Female <sup>e</sup>                 | 0.10    | 0.04 | 0.01 | *                       | 0.02                    | 0.18  |
| Proportion of Households under Poverty      | 0.16    | 0.24 | 0.51 | -0.31                   | 0.63                    |       |
| No. of Household Members                    | -0.01   | 0.02 | 0.60 | -0.05                   | 0.03                    |       |
| Caregiver Smokes: Yes <sup>f</sup>          | 0.09    | 0.05 | 0.09 | -0.01                   | 0.19                    |       |
| Epigenetic Assay: Batch 1 <sup>g</sup>      | -0.15   | 0.15 | 0.34 | -0.45                   | 0.16                    |       |
| Epigenetic Assay: Batch 2 <sup>g</sup>      | -0.16   | 0.16 | 0.33 | -0.47                   | 0.16                    |       |
| Any Loss in Childhood*Any Loss in Adulthood | -0.33   | 0.17 | 0.05 | -0.66                   | 0.00                    |       |
| GrimAge                                     |         |      |      |                         |                         |       |

|                                             | b     | se   | p    |     | 95% CI<br>(Lower Limit) | 95% CI<br>(Upper Limit) |
|---------------------------------------------|-------|------|------|-----|-------------------------|-------------------------|
| Any Loss in Childhood: Yes <sup>a</sup>     | 0.17  | 0.11 | 0.12 |     | -0.05                   | 0.38                    |
| Any Loss in Adulthood: Yes <sup>a</sup>     | 0.18  | 0.05 | 0.00 | *** | 0.08                    | 0.28                    |
| Age                                         | -0.05 | 0.01 | 0.00 | *** | -0.07                   | -0.03                   |
| Race: Black <sup>b</sup>                    | 0.13  | 0.06 | 0.05 |     | 0.00                    | 0.25                    |
| Race: Hispanic <sup>b</sup>                 | -0.41 | 0.09 | 0.00 | *** | -0.59                   | -0.24                   |
| Race: Other <sup>b,c</sup>                  | -0.01 | 0.11 | 0.92 |     | -0.22                   | 0.20                    |
| Parent Education: High School <sup>d</sup>  | 0.42  | 0.06 | 0.00 | *** | 0.30                    | 0.54                    |
| Parent Education: Some College <sup>d</sup> | 0.29  | 0.05 | 0.00 | *** | 0.19                    | 0.40                    |
| Gender: Female <sup>e</sup>                 | -0.40 | 0.04 | 0.00 | *** | -0.48                   | -0.31                   |
| Proportion of Households under Poverty      | 0.49  | 0.24 | 0.05 | *   | 0.00                    | 0.97                    |
| No. of Household Members                    | 0.02  | 0.02 | 0.32 |     | -0.02                   | 0.06                    |
| Caregiver Smokes: Yes <sup>f</sup>          | 0.46  | 0.06 | 0.00 | *** | 0.34                    | 0.58                    |
| Epigenetic Assay: Batch 1 <sup>g</sup>      | -0.15 | 0.29 | 0.61 |     | -0.72                   | 0.43                    |
| Epigenetic Assay: Batch 2 <sup>g</sup>      | 0.22  | 0.28 | 0.44 |     | -0.34                   | 0.77                    |
| Any Loss in Childhood*Any Loss in Adulthood | -0.16 | 0.18 | 0.36 |     | -0.51                   | 0.19                    |

DunedinPACE

|                                             | b     | se   | p    |     | 95% CI<br>(Lower Limit) | 95% CI<br>(Upper Limit) |
|---------------------------------------------|-------|------|------|-----|-------------------------|-------------------------|
| Any Loss in Childhood: Yes <sup>a</sup>     | 0.20  | 0.10 | 0.06 |     | 0.00                    | 0.40                    |
| Any Loss in Adulthood: Yes <sup>a</sup>     | 0.18  | 0.05 | 0.00 | *** | 0.09                    | 0.27                    |
| Age                                         | 0.02  | 0.01 | 0.10 |     | 0.00                    | 0.04                    |
| Race: Black <sup>b</sup>                    | 0.35  | 0.07 | 0.00 | *** | 0.22                    | 0.48                    |
| Race: Hispanic <sup>b</sup>                 | 0.07  | 0.11 | 0.54 |     | -0.15                   | 0.28                    |
| Race: Other <sup>b,c</sup>                  | 0.29  | 0.12 | 0.01 | *   | 0.06                    | 0.51                    |
| Parent Education: High School <sup>d</sup>  | 0.51  | 0.06 | 0.00 | *** | 0.40                    | 0.62                    |
| Parent Education: Some College <sup>d</sup> | 0.30  | 0.05 | 0.00 | *** | 0.19                    | 0.40                    |
| Gender: Female <sup>e</sup>                 | 0.17  | 0.04 | 0.00 | *** | 0.09                    | 0.25                    |
| Proportion of Households under Poverty      | 0.66  | 0.23 | 0.00 | **  | 0.20                    | 1.11                    |
| No. of Household Members                    | 0.02  | 0.02 | 0.36 |     | -0.02                   | 0.05                    |
| Caregiver Smokes: Yes <sup>f</sup>          | 0.20  | 0.06 | 0.00 | *** | 0.09                    | 0.32                    |
| Epigenetic Assay: Batch 1 <sup>g</sup>      | 0.07  | 0.13 | 0.59 |     | -0.18                   | 0.32                    |
| Epigenetic Assay: Batch 2 <sup>g</sup>      | 0.14  | 0.12 | 0.25 |     | -0.10                   | 0.38                    |
| Any Loss in Childhood*Any Loss in Adulthood | -0.34 | 0.15 | 0.03 | *   | -0.64                   | -0.04                   |

Note: a = No Loss (reference) b = White (reference); c = Asian, Native American, Pacific Islander, Other (other race or multi-racial); d = College or Higher reference; e = Male (reference); f = No (reference); g = Batch 3 (reference)

\* $p \leq 0.05$ ; \*\* $p \leq 0.01$ ; \*\*\* $p \leq 0.001$

eTable 19. Interaction Between Parental Loss in Childhood and in Adulthood and its Association With Biological Aging (n=3,963)

| Horvath                                               |       |      |      |     |                         |               |
|-------------------------------------------------------|-------|------|------|-----|-------------------------|---------------|
|                                                       | b     | se   | p    |     | 95% CI<br>(Lower Limit) | 95%<br>(Upper |
| Parental Loss in Childhood: Yes <sup>a</sup>          | -0.10 | 0.09 | 0.30 |     | -0.29                   | 0.0           |
| Parental Loss in Adulthood: Yes <sup>a</sup>          | 0.02  | 0.05 | 0.72 |     | -0.08                   | 0.0           |
| Age                                                   | -0.02 | 0.01 | 0.16 |     | -0.04                   | 0.0           |
| Race: Black <sup>b</sup>                              | -0.03 | 0.08 | 0.71 |     | -0.18                   | 0.0           |
| Race: Hispanic <sup>b</sup>                           | -0.16 | 0.10 | 0.11 |     | -0.35                   | 0.0           |
| Race: Other <sup>b,c</sup>                            | 0.09  | 0.08 | 0.27 |     | -0.07                   | 0.0           |
| Parent Education: High School <sup>d</sup>            | 0.12  | 0.06 | 0.05 |     | 0.00                    | 0.0           |
| Parent Education: Some College <sup>d</sup>           | 0.02  | 0.05 | 0.66 |     | -0.08                   | 0.0           |
| Gender: Female <sup>e</sup>                           | -0.36 | 0.04 | 0.00 | *** | -0.45                   | -0.0          |
| Proportion of Households under Poverty                | 0.09  | 0.20 | 0.66 |     | -0.30                   | 0.0           |
| No. of Household Members                              | 0.02  | 0.02 | 0.43 |     | -0.02                   | 0.0           |
| Caregiver Smokes: Yes <sup>f</sup>                    | -0.08 | 0.06 | 0.19 |     | -0.19                   | 0.0           |
| Epigenetic Assay: Batch 1 <sup>g</sup>                | 0.33  | 0.23 | 0.16 |     | -0.13                   | 0.0           |
| Epigenetic Assay: Batch 2 <sup>g</sup>                | 0.40  | 0.23 | 0.09 |     | -0.06                   | 0.0           |
| Parental Loss in Childhood*Parental Loss in Adulthood | 0.09  | 0.20 | 0.67 |     | -0.32                   | 0.0           |
| PhenoAge                                              |       |      |      |     |                         |               |
|                                                       | b     | se   | p    |     | 95% CI<br>(Lower Limit) | 95%<br>(Upper |
| Parental Loss in Childhood: Yes <sup>a</sup>          | 0.12  | 0.11 | 0.26 |     | -0.09                   | 0.0           |
| Parental Loss in Adulthood: Yes <sup>a</sup>          | 0.12  | 0.05 | 0.02 | *   | 0.02                    | 0.0           |
| Age                                                   | -0.01 | 0.01 | 0.52 |     | -0.03                   | 0.0           |
| Race: Black <sup>b</sup>                              | -0.19 | 0.07 | 0.01 | **  | -0.33                   | -0.0          |
| Race: Hispanic <sup>b</sup>                           | -0.05 | 0.10 | 0.64 |     | -0.25                   | 0.0           |
| Race: Other <sup>b,c</sup>                            | 0.00  | 0.13 | 0.98 |     | -0.27                   | 0.0           |
| Parent Education: High School <sup>d</sup>            | 0.27  | 0.05 | 0.00 | *** | 0.16                    | 0.0           |
| Parent Education: Some College <sup>d</sup>           | 0.16  | 0.06 | 0.01 | **  | 0.04                    | 0.0           |
| Gender: Female <sup>e</sup>                           | 0.10  | 0.04 | 0.01 | *   | 0.02                    | 0.0           |
| Proportion of Households under Poverty                | 0.15  | 0.24 | 0.53 |     | -0.32                   | 0.0           |
| No. of Household Members                              | -0.01 | 0.02 | 0.61 |     | -0.05                   | 0.0           |
| Caregiver Smokes: Yes <sup>f</sup>                    | 0.09  | 0.05 | 0.11 |     | -0.02                   | 0.0           |
| Epigenetic Assay: Batch 1 <sup>g</sup>                | -0.15 | 0.15 | 0.34 |     | -0.45                   | 0.0           |
| Epigenetic Assay: Batch 2 <sup>g</sup>                | -0.16 | 0.16 | 0.32 |     | -0.47                   | 0.0           |
| Parental Loss in Childhood*Parental Loss in Adulthood | -0.19 | 0.19 | 0.33 |     | -0.57                   | 0.0           |
| GrimAge                                               |       |      |      |     |                         |               |

|                                                       | b     | se   | p    |     | 95% CI<br>(Lower Limit) | 95% CI<br>(Upper Limit) |
|-------------------------------------------------------|-------|------|------|-----|-------------------------|-------------------------|
| Parental Loss in Childhood: Yes <sup>a</sup>          | 0.17  | 0.12 | 0.14 |     | -0.06                   | 0.41                    |
| Parental Loss in Adulthood: Yes <sup>a</sup>          | 0.18  | 0.05 | 0.00 | *** | 0.08                    | 0.28                    |
| Age                                                   | -0.05 | 0.01 | 0.00 | *** | -0.07                   | -0.03                   |
| Race: Black <sup>b</sup>                              | 0.13  | 0.06 | 0.05 | .   | 0.00                    | 0.25                    |
| Race: Hispanic <sup>b</sup>                           | -0.42 | 0.09 | 0.00 | *** | -0.59                   | -0.24                   |
| Race: Other <sup>b,c</sup>                            | -0.01 | 0.11 | 0.92 |     | -0.22                   | 0.20                    |
| Parent Education: High School <sup>d</sup>            | 0.42  | 0.06 | 0.00 | *** | 0.30                    | 0.54                    |
| Parent Education: Some College <sup>d</sup>           | 0.29  | 0.05 | 0.00 | *** | 0.19                    | 0.40                    |
| Gender: Female <sup>e</sup>                           | -0.40 | 0.04 | 0.00 | *** | -0.48                   | -0.31                   |
| Proportion of Households under Poverty                | 0.49  | 0.25 | 0.05 | *   | 0.01                    | 0.98                    |
| No. of Household Members                              | 0.02  | 0.02 | 0.31 |     | -0.02                   | 0.06                    |
| Caregiver Smokes: Yes <sup>f</sup>                    | 0.46  | 0.06 | 0.00 | *** | 0.35                    | 0.58                    |
| Epigenetic Assay: Batch 1 <sup>g</sup>                | -0.15 | 0.29 | 0.60 |     | -0.72                   | 0.42                    |
| Epigenetic Assay: Batch 2 <sup>g</sup>                | 0.21  | 0.28 | 0.45 |     | -0.34                   | 0.76                    |
| Parental Loss in Childhood*Parental Loss in Adulthood | -0.24 | 0.19 | 0.23 |     | -0.62                   | 0.15                    |

DunedinPACE

|                                                       | b     | se   | p    |     | 95% CI<br>(Lower Limit) | 95% CI<br>(Upper Limit) |
|-------------------------------------------------------|-------|------|------|-----|-------------------------|-------------------------|
| Parental Loss in Childhood: Yes <sup>a</sup>          | 0.19  | 0.11 | 0.08 | .   | -0.02                   | 0.41                    |
| Parental Loss in Adulthood: Yes <sup>a</sup>          | 0.19  | 0.05 | 0.00 | *** | 0.10                    | 0.28                    |
| Age                                                   | 0.02  | 0.01 | 0.10 |     | 0.00                    | 0.04                    |
| Race: Black <sup>b</sup>                              | 0.35  | 0.07 | 0.00 | *** | 0.22                    | 0.48                    |
| Race: Hispanic <sup>b</sup>                           | 0.07  | 0.11 | 0.54 |     | -0.15                   | 0.28                    |
| Race: Other <sup>b,c</sup>                            | 0.29  | 0.11 | 0.01 | *   | 0.06                    | 0.51                    |
| Parent Education: High School <sup>d</sup>            | 0.51  | 0.06 | 0.00 | *** | 0.40                    | 0.62                    |
| Parent Education: Some College <sup>d</sup>           | 0.30  | 0.05 | 0.00 | *** | 0.19                    | 0.40                    |
| Gender: Female <sup>e</sup>                           | 0.17  | 0.04 | 0.00 | *** | 0.09                    | 0.25                    |
| Proportion of Households under Poverty                | 0.65  | 0.23 | 0.01 | **  | 0.20                    | 1.11                    |
| No. of Household Members                              | 0.02  | 0.02 | 0.34 |     | -0.02                   | 0.05                    |
| Caregiver Smokes: Yes <sup>f</sup>                    | 0.20  | 0.06 | 0.00 | *** | 0.09                    | 0.32                    |
| Epigenetic Assay: Batch 1 <sup>g</sup>                | 0.06  | 0.12 | 0.61 |     | -0.18                   | 0.31                    |
| Epigenetic Assay: Batch 2 <sup>g</sup>                | 0.14  | 0.12 | 0.26 |     | -0.10                   | 0.37                    |
| Parental Loss in Childhood*Parental Loss in Adulthood | -0.40 | 0.19 | 0.04 | *   | -0.77                   | -0.02                   |

Note: a = No Loss (reference) b = White (reference); c = Asian, Native American, Pacific Islander, Other (other race or multiracial); d = College or Higher reference; e = Male (reference); f = No (reference); g = Batch 3 (reference)

\* $p \leq 0.05$ ; \*\* $p \leq 0.01$ ; \*\*\* $p \leq 0.001$
