# Supplementary material for: Familial Loss of a Loved One and Biological Aging: NIMHD Social Epigenomics Program
Source: PubMed Central journal article supplement (PMC11287397; doi:10.1001/jamanetworkopen.2024.21869), 2024-07-29
Supplement: jamanetwopen-e2421869-s002.pdf [file jamanetwopen-e2421869-s002.pdf]

## Data Sharing Statement

Aiello. Familial Loss of a Loved One and Biological Aging. *JAMA Netw Open*. Published July 29, 2024. doi:10.1001/jamanetworkopen.2024.21869

### Data

**Data available:** Yes

**Data types:** Deidentified participant data

**How to access data:** <https://addhealth.cpc.unc.edu>

**When available:** beginning date: 01-01-2025

### Supporting Documents

**Document types:** None

### Additional Information

**Who can access the data:** researchers whose proposed use of the data has been approved

**Types of analyses:** for a specified purpose

**Mechanisms of data availability:** with a signed data access agreement)
